# Supplementary material for: Integrated computational analysis revealed hub genes in lung adenocarcinoma
Source: Research Square preprint supplement (doi:10.21203/rs.3.rs-294392/v1), 2021-03-03
Supplement: Supplementary file 1 [file 2d8b4bd5d1f83827158f6345.xlsx]

## Sheet: Upregulated
Table S2: GO and KEGG enrichment of the DEGs
GO_acc	term_type	Term	queryitem	querytotal	bgitem	bgtotal	pvalue	FDR	entries
GO:0030574	P	collagen catabolic process	7	72	67	19133	1.1e-08	1.7e-05	// COL10A1 // COL11A1 // MMP12 // MMP9 // COL1A1 // COL3A1 // MMP11
GO:0044243	P	multicellular organismal catabolic process	7	72	74	19133	2.2e-08	1.7e-05	// COL10A1 // COL11A1 // MMP12 // MMP9 // COL1A1 // COL3A1 // MMP11
GO:0032963	P	collagen metabolic process	7	72	111	19133	2.9e-07	0.00015	// COL10A1 // COL11A1 // MMP12 // MMP9 // COL1A1 // COL3A1 // MMP11
GO:0044259	P	multicellular organismal macromolecule metabolic process	7	72	116	19133	3.9e-07	0.00015	// COL10A1 // COL11A1 // MMP12 // MMP9 // COL1A1 // COL3A1 // MMP11
GO:0044236	P	multicellular organismal metabolic process	7	72	133	19133	9.3e-07	0.0003	// COL10A1 // COL11A1 // MMP12 // MMP9 // COL1A1 // COL3A1 // MMP11
GO:0030198	P	extracellular matrix organization	9	72	334	19133	5.3e-06	0.0014	// COL10A1 // COL11A1 // MMP12 // MMP9 // SULF1 // SPP1 // COL1A1 // COL3A1 // MMP11
GO:0043062	P	extracellular structure organization	11	72	557	19133	8.1e-06	0.0018	// COL10A1 // COL11A1 // MMP12 // MMP9 // THBS2 // SULF1 // CDC20 // SPP1 // COL1A1 // COL3A1 // MMP11
GO:0051301	P	cell division	10	72	577	19133	6.4e-05	0.013	// CCNB2 // TPX2 // ECT2 // ASPM // CDC20 // CDCA7 // CENPF // PRC1 // KIF20A // TOP2A
GO:0009888	P	tissue development	18	72	1852	19133	0.00014	0.025	// COL10A1 // CRABP2 // COL11A1 // GCNT3 // TFAP2A // CENPF // GJB2 // AGR2 // SULF1 // TYMS // CEACAM5 // DSP // SPP1 // COL1A1 // COL3A1 // CDH3 // CTHRC1 // ETV4
GO:0048731	P	system development	31	72	4582	19133	0.00029	0.042	// COL10A1 // COL11A1 // HMGB3 // SLC7A5 // COL3A1 // GCNT3 // TYMS // TFAP2A // ASPM // GJB2 // THBS2 // SULF1 // CEACAM5 // CRABP2 // CDH3 // TOP2A // CENPF // MMP9 // DSP // TNFRSF21 // EPCAM // ETV4 // CCNB2 // ECT2 // PCP4 // AGR2 // CDC20 // MELK // SPP1 // COL1A1 // CTHRC1
GO:0001501	P	skeletal system development	10	72	694	19133	0.00028	0.042	// COL10A1 // COL11A1 // TFAP2A // MMP9 // SULF1 // TYMS // SPP1 // COL1A1 // COL3A1 // CTHRC1
GO:0060348	P	bone development	8	72	468	19133	0.0004	0.053	// COL10A1 // COL11A1 // TFAP2A // MMP9 // SULF1 // SPP1 // COL1A1 // CTHRC1
GO:0048513	P	organ development	26	72	3614	19133	0.00046	0.056	// COL10A1 // COL11A1 // HMGB3 // COL3A1 // GCNT3 // TYMS // TFAP2A // ASPM // GJB2 // THBS2 // SULF1 // CEACAM5 // CDH3 // TOP2A // CENPF // MMP9 // DSP // EPCAM // ETV4 // CCNB2 // CRABP2 // AGR2 // MELK // SPP1 // COL1A1 // CTHRC1
GO:0001503	P	ossification	7	72	369	19133	0.00051	0.058	// COL10A1 // COL11A1 // TFAP2A // MMP9 // SPP1 // COL1A1 // CTHRC1
GO:0048729	P	tissue morphogenesis	9	72	629	19133	0.00061	0.065	// COL11A1 // GCNT3 // TFAP2A // SULF1 // DSP // COL1A1 // COL3A1 // CTHRC1 // ETV4
GO:0051216	P	cartilage development	5	72	183	19133	0.0007	0.07	// COL10A1 // TYMS // COL11A1 // SULF1 // COL1A1
GO:0007275	P	multicellular organismal development	32	72	5093	19133	0.00086	0.08	// COL10A1 // COL11A1 // HMGB3 // SLC7A5 // COL3A1 // MMP11 // GCNT3 // TYMS // TFAP2A // ASPM // GJB2 // THBS2 // SULF1 // CEACAM5 // CRABP2 // CDH3 // TOP2A // CENPF // MMP9 // DSP // TNFRSF21 // EPCAM // ETV4 // CCNB2 // ECT2 // PCP4 // AGR2 // CDC20 // MELK // SPP1 // COL1A1 // CTHRC1
GO:0032501	P	multicellular organismal process	41	72	7398	19133	0.0013	0.11	// COL10A1 // COL11A1 // MMP12 // HMGB3 // RPL39L // SLC7A5 // NQO1 // COL3A1 // MMP11 // AKR1B10 // ECT2 // TYMS // TFAP2A // ASPM // GJB2 // THBS2 // SULF1 // CEACAM5 // CRABP2 // CDH3 // CST1 // TOP2A // CENPF // MMP9 // DSP // AIM2 // CHRNA5 // TNFRSF21 // EPCAM // IGF2BP3 // ETV4 // CCNB2 // GCNT3 // PCP4 // AGR2 // CDC20 // MELK // SPP1 // FBXO32 // COL1A1 // CTHRC1
GO:0022403	P	cell cycle phase	10	72	921	19133	0.0024	0.2	// CCNB2 // TPX2 // TYMS // ASPM // CDC20 // MELK // CENPF // CDC45 // PRC1 // TOP2A
GO:0050793	P	regulation of developmental process	18	72	2402	19133	0.003	0.24	// THBS2 // MMP11 // ECT2 // HMGB3 // ASPM // COL1A1 // AGR2 // SULF1 // CDC20 // TFAP2A // TNFRSF21 // CEACAM5 // SPP1 // CENPF // CRABP2 // CDH3 // CTHRC1 // ETV4
GO:0001822	P	kidney development	5	72	267	19133	0.0035	0.25	// TFAP2A // CENPF // SULF1 // GCNT3 // EPCAM
GO:0051329	P	interphase of mitotic cell cycle	6	72	382	19133	0.0033	0.25	// CCNB2 // TPX2 // MELK // CENPF // TYMS // CDC45
GO:0032502	P	developmental process	34	72	5987	19133	0.0034	0.25	// COL10A1 // COL11A1 // HMGB3 // SLC7A5 // NQO1 // COL3A1 // MMP11 // GCNT3 // TYMS // TFAP2A // ASPM // GJB2 // THBS2 // SULF1 // CEACAM5 // CRABP2 // CDH3 // TOP2A // CENPF // MMP9 // DSP // TNFRSF21 // EPCAM // IGF2BP3 // ETV4 // CCNB2 // ECT2 // PCP4 // AGR2 // CDC20 // MELK // SPP1 // COL1A1 // CTHRC1
GO:0030154	P	cell differentiation	24	72	3726	19133	0.0039	0.26	// COL11A1 // HMGB3 // SLC7A5 // MMP11 // CRABP2 // TFAP2A // ASPM // SULF1 // CEACAM5 // CDH3 // TOP2A // CENPF // MMP9 // DSP // TNFRSF21 // EPCAM // ETV4 // ECT2 // AGR2 // CDC20 // TYMS // SPP1 // COL1A1 // CTHRC1
GO:0051325	P	interphase	6	72	404	19133	0.0044	0.28	// CCNB2 // TPX2 // MELK // CENPF // TYMS // CDC45
GO:0072001	P	renal system development	5	72	283	19133	0.0045	0.28	// TFAP2A // CENPF // SULF1 // GCNT3 // EPCAM
GO:0048856	P	anatomical structure development	32	72	5611	19133	0.0047	0.28	// COL10A1 // COL11A1 // HMGB3 // SLC7A5 // COL3A1 // GCNT3 // TYMS // TFAP2A // ASPM // GJB2 // THBS2 // SULF1 // CEACAM5 // CRABP2 // CDH3 // TOP2A // CENPF // MMP9 // DSP // TNFRSF21 // EPCAM // IGF2BP3 // ETV4 // CCNB2 // ECT2 // PCP4 // AGR2 // CDC20 // MELK // SPP1 // COL1A1 // CTHRC1
GO:0009887	P	organ morphogenesis	11	72	1203	19133	0.0053	0.3	// COL10A1 // COL11A1 // GCNT3 // TFAP2A // AGR2 // SULF1 // DSP // COL1A1 // COL3A1 // CTHRC1 // ETV4
GO:0008283	P	cell proliferation	15	72	1989	19133	0.0067	0.37	// TPX2 // CDH3 // ETV4 // MMP12 // TFAP2A // ASPM // SULF1 // CDC20 // TYMS // TNFRSF21 // CDCA7 // CENPF // FAM83A // CTHRC1 // PRC1
GO:0016043	P	cellular component organization	35	72	6507	19133	0.0074	0.38	// COL10A1 // COL11A1 // MMP12 // COL3A1 // PRC1 // KIAA0101 // MMP11 // TPX2 // KIF20A // ECT2 // ASPM // GJB2 // THBS2 // SULF1 // CRABP2 // CDH3 // PLEK2 // CENPF // ATP10B // MMP9 // TMPRSS4 // DSP // AIM2 // PROM2 // CCNB2 // ETV4 // AGR2 // SLC2A1 // CDC20 // SPP1 // COL1A1 // CDC45 // TOP2A // CTHRC1 // GOLM1
GO:0001655	P	urogenital system development	5	72	320	19133	0.0075	0.38	// TFAP2A // CENPF // SULF1 // GCNT3 // EPCAM
GO:0000279	P	M phase	7	72	621	19133	0.0091	0.45	// CCNB2 // TPX2 // ASPM // CDC20 // CENPF // PRC1 // TOP2A
GO:0008544	P	epidermis development	5	72	344	19133	0.01	0.48	// COL3A1 // CDH3 // CRABP2 // DSP // COL1A1
GO:0022402	P	cell cycle process	11	72	1362	19133	0.013	0.54	// CCNB2 // TPX2 // TYMS // ASPM // CDC20 // MELK // CENPF // CDC45 // PRC1 // KIF20A // TOP2A
GO:0048545	P	response to steroid hormone stimulus	6	72	507	19133	0.012	0.54	// GJB2 // NQO1 // TYMS // SPP1 // FBXO32 // COL1A1
GO:0007398	P	ectoderm development	5	72	360	19133	0.012	0.54	// COL3A1 // CDH3 // CRABP2 // DSP // COL1A1
GO:0006520	P	cellular amino acid metabolic process	5	72	359	19133	0.012	0.54	// PSAT1 // PYCR1 // SLC7A5 // LGSN // NQO1
GO:0000278	P	mitotic cell cycle	9	72	1001	19133	0.013	0.54	// CCNB2 // TPX2 // TYMS // ASPM // CDC20 // MELK // CENPF // CDC45 // PRC1
GO:0007399	P	nervous system development	15	72	2171	19133	0.014	0.59	// CRABP2 // PCP4 // ETV4 // ECT2 // TFAP2A // ASPM // SLC7A5 // THBS2 // SULF1 // CDC20 // TNFRSF21 // SPP1 // CENPF // COL3A1 // CTHRC1
GO:0051239	P	regulation of multicellular organismal process	18	72	2824	19133	0.016	0.62	// ETV4 // ECT2 // HMGB3 // ASPM // COL1A1 // THBS2 // SULF1 // AIM2 // TFAP2A // TNFRSF21 // IGF2BP3 // CEACAM5 // SPP1 // CENPF // CRABP2 // CDH3 // CDC20 // CTHRC1
GO:0048869	P	cellular developmental process	24	72	4195	19133	0.017	0.64	// COL11A1 // HMGB3 // SLC7A5 // MMP11 // CRABP2 // TFAP2A // ASPM // SULF1 // CEACAM5 // CDH3 // TOP2A // CENPF // MMP9 // DSP // TNFRSF21 // EPCAM // ETV4 // ECT2 // AGR2 // CDC20 // TYMS // SPP1 // COL1A1 // CTHRC1
GO:0045595	P	regulation of cell differentiation	12	72	1616	19133	0.017	0.64	// MMP11 // ECT2 // HMGB3 // ASPM // CDC20 // TFAP2A // TNFRSF21 // CEACAM5 // SPP1 // COL1A1 // CRABP2 // CTHRC1
GO:0006979	P	response to oxidative stress	5	72	394	19133	0.017	0.64	// COL1A1 // GPX2 // GJB2 // ECT2 // NQO1
GO:0009792	P	embryonic development ending in birth or egg hatching	6	72	584	19133	0.023	0.8	// CCNB2 // COL11A1 // TFAP2A // SULF1 // COL1A1 // CTHRC1
GO:0060284	P	regulation of cell development	8	72	924	19133	0.023	0.8	// ECT2 // CRABP2 // ASPM // CDC20 // TNFRSF21 // CEACAM5 // COL1A1 // SPP1
GO:0043009	P	chordate embryonic development	6	72	578	19133	0.022	0.8	// CCNB2 // COL11A1 // TFAP2A // SULF1 // COL1A1 // CTHRC1
GO:0051093	P	negative regulation of developmental process	8	72	940	19133	0.025	0.85	// MMP11 // HMGB3 // ASPM // THBS2 // SULF1 // CEACAM5 // SPP1 // CDH3
GO:0051960	P	regulation of nervous system development	7	72	769	19133	0.026	0.86	// ECT2 // CRABP2 // ASPM // THBS2 // CDC20 // TNFRSF21 // SPP1
GO:0007049	P	cell cycle	12	72	1731	19133	0.028	0.9	// CCNB2 // TPX2 // TYMS // ASPM // CDC20 // MELK // CENPF // CDC45 // PRC1 // KIF20A // KIAA0101 // TOP2A
GO:0060537	P	muscle tissue development	5	72	456	19133	0.029	0.93	// COL3A1 // CEACAM5 // COL11A1 // DSP // CENPF
GO:0009790	P	embryonic development	8	72	971	19133	0.03	0.93	// CCNB2 // COL11A1 // CRABP2 // TFAP2A // SULF1 // COL1A1 // CTHRC1 // TOP2A
GO:0042127	P	regulation of cell proliferation	11	72	1552	19133	0.03	0.93	// ETV4 // MMP12 // TFAP2A // ASPM // SULF1 // CDC20 // TNFRSF21 // CDCA7 // CDH3 // CTHRC1 // PRC1
GO:0000226	P	microtubule cytoskeleton organization	5	72	468	19133	0.032	0.96	// KIAA0101 // TPX2 // PRC1 // ECT2 // KIF20A
GO:0008152	P	metabolic process	51	72	11404	19133	0.033	0.96	// COL10A1 // COL11A1 // MMP12 // HMGB3 // RPL39L // SLC7A5 // NQO1 // COL3A1 // PYCR1 // KIAA0101 // SLC50A1 // MMP11 // TPX2 // AKR1B10 // LGSN // ECT2 // TYMS // TFAP2A // SULF1 // CDCA7 // CRABP2 // CDH3 // SPINK1 // FUT2 // PLPP2 // CENPF // MMP9 // TMPRSS4 // DSP // AIM2 // C15orf48 // PROM2 // EPCAM // IGF2BP3 // SERINC2 // ETV4 // SMPDL3B // GCNT3 // AGR2 // SLC2A1 // CDC20 // PSAT1 // ME…
GO:0016055	P	Wnt receptor signaling pathway	5	72	479	19133	0.035	0.98	// ASPM // CDH3 // CTHRC1 // SULF1 // COL1A1
GO:0051094	P	positive regulation of developmental process	9	72	1193	19133	0.035	0.98	// CRABP2 // ECT2 // TFAP2A // ASPM // THBS2 // AGR2 // CDC20 // COL1A1 // CTHRC1
GO:0009987	P	cellular process	66	72	15957	19133	0.035	0.98	// COL10A1 // CLDN10 // COL11A1 // MMP12 // HMGB3 // RPL39L // SLC7A5 // S100P // NQO1 // UBE2T // MMP9 // COL3A1 // PYCR1 // FAM83A // SLC50A1 // MMP11 // TPX2 // AKR1B10 // LGSN // ECT2 // TYMS // TFAP2A // ASPM // GJB2 // THBS2 // SULF1 // CEACAM5 // CDCA7 // CRABP2 // CDH3 // SPINK1 // PLEK2 // PLPP2 // CENPF // ATP10B // FUT2 // TMPRSS4 // DSP // AIM2 // CHRNA5 // TNFRSF21 // PROM2 // EPCAM …
GO:0019226	P	transmission of nerve impulse	5	72	846	19133	0.21	1	// CHRNA5 // TNFRSF21 // CDC20 // THBS2 // NQO1
GO:0009628	P	response to abiotic stimulus	6	72	1030	19133	0.19	1	// COL11A1 // ECT2 // SLC2A1 // COL1A1 // COL3A1 // KIAA0101
GO:0019220	P	regulation of phosphate metabolic process	5	72	1628	19133	0.74	1	// TPX2 // MMP9 // SPINK1 // ECT2 // PROM2
GO:0080090	P	regulation of primary metabolic process	19	72	5896	19133	0.83	1	// ETV4 // CRABP2 // TYMS // HMGB3 // CENPF // MMP9 // CDC20 // NQO1 // TFAP2A // CDCA7 // GOLM1 // COL1A1 // CDC45 // EPCAM // IGF2BP3 // AIM2 // TOP2A // SPINK1 // PROM2
GO:0019222	P	regulation of metabolic process	24	72	6434	19133	0.57	1	// HMGB3 // NQO1 // SLC50A1 // TPX2 // CRABP2 // ECT2 // TFAP2A // CDCA7 // CDH3 // SPINK1 // TOP2A // CENPF // COL1A1 // AIM2 // PROM2 // EPCAM // IGF2BP3 // ETV4 // AGR2 // CDC20 // TYMS // MMP9 // CDC45 // GOLM1
GO:0051049	P	regulation of transport	5	72	1822	19133	0.83	1	// PROM2 // SLC2A1 // SPINK1 // ECT2 // AIM2
GO:0048468	P	cell development	13	72	2123	19133	0.053	1	// COL11A1 // ECT2 // ASPM // SULF1 // CDC20 // TYMS // TNFRSF21 // CEACAM5 // SPP1 // COL1A1 // CRABP2 // CTHRC1 // ETV4
GO:0061024	P	membrane organization	5	72	1693	19133	0.77	1	// TMPRSS4 // ATP10B // AGR2 // PROM2 // CCNB2
GO:0007165	P	signal transduction	16	72	5836	19133	0.95	1	// SMPDL3B // PLPP2 // CRABP2 // ECT2 // ASPM // MMP9 // AGR2 // SULF1 // AIM2 // CHRNA5 // TNFRSF21 // COL1A1 // COL3A1 // CDH3 // CTHRC1 // SPINK1
GO:0007166	P	cell surface receptor linked signaling pathway	10	72	3638	19133	0.9	1	// CDH3 // ASPM // MMP9 // AGR2 // SULF1 // TNFRSF21 // COL1A1 // COL3A1 // FAM83A // CTHRC1
GO:0007167	P	enzyme linked receptor protein signaling pathway	6	72	1008	19133	0.18	1	// AGR2 // SULF1 // MMP9 // COL3A1 // FAM83A // CDH3
GO:0007169	P	transmembrane receptor protein tyrosine kinase signaling pathway	5	72	709	19133	0.13	1	// FAM83A // AGR2 // CDH3 // SULF1 // MMP9
GO:0010556	P	regulation of macromolecule biosynthetic process	13	72	4116	19133	0.8	1	// ETV4 // CRABP2 // TYMS // HMGB3 // CENPF // AIM2 // TFAP2A // CDCA7 // COL1A1 // CDC45 // EPCAM // IGF2BP3 // TOP2A
GO:0044255	P	cellular lipid metabolic process	5	72	1070	19133	0.38	1	// SMPDL3B // PLPP2 // AKR1B10 // CRABP2 // SERINC2
GO:0032774	P	RNA biosynthetic process	11	72	3905	19133	0.89	1	// ETV4 // CRABP2 // TYMS // HMGB3 // CENPF // TFAP2A // CDCA7 // COL1A1 // CDC45 // EPCAM // TOP2A
GO:0007517	P	muscle organ development	5	72	532	19133	0.051	1	// COL3A1 // CEACAM5 // COL11A1 // DSP // CENPF
GO:0010605	P	negative regulation of macromolecule metabolic process	6	72	2341	19133	0.89	1	// TFAP2A // CENPF // CDC20 // CDC45 // IGF2BP3 // SPINK1
GO:0010604	P	positive regulation of macromolecule metabolic process	11	72	2860	19133	0.52	1	// ETV4 // TFAP2A // MMP9 // AGR2 // CDC20 // PROM2 // COL1A1 // EPCAM // CDH3 // SLC50A1 // TOP2A
GO:0009966	P	regulation of signal transduction	12	72	2739	19133	0.33	1	// SMPDL3B // CRABP2 // ECT2 // ASPM // MMP9 // AGR2 // SULF1 // COL1A1 // COL3A1 // CDH3 // CTHRC1 // SPINK1
GO:0009611	P	response to wounding	9	72	1300	19133	0.055	1	// SMPDL3B // MMP12 // DSP // AIM2 // TNFRSF21 // SPP1 // COL1A1 // COL3A1 // CDH3
GO:0008104	P	protein localization	7	72	2504	19133	0.85	1	// ECT2 // CENPF // AGR2 // AIM2 // COL1A1 // KDELR3 // KIF20A
GO:0045664	P	regulation of neuron differentiation	5	72	560	19133	0.061	1	// ASPM // SPP1 // CRABP2 // ECT2 // CDC20
GO:0044093	P	positive regulation of molecular function	7	72	1975	19133	0.62	1	// TPX2 // ECT2 // CDC20 // MMP9 // CDH3 // AIM2 // CTHRC1
GO:0048518	P	positive regulation of biological process	26	72	5343	19133	0.081	1	// MMP12 // NQO1 // COL3A1 // PRC1 // SLC50A1 // CRABP2 // TFAP2A // ASPM // THBS2 // SULF1 // CDH3 // TOP2A // MMP9 // AIM2 // TNFRSF21 // PROM2 // EPCAM // ETV4 // SMPDL3B // ECT2 // AGR2 // CDC20 // MELK // SPP1 // COL1A1 // CTHRC1
GO:0048519	P	negative regulation of biological process	24	72	4663	19133	0.055	1	// MMP11 // HMGB3 // NQO1 // COL3A1 // TFAP2A // ASPM // THBS2 // SULF1 // CEACAM5 // CDH3 // SPINK1 // CENPF // TNFRSF21 // PROM2 // EPCAM // IGF2BP3 // SMPDL3B // ETV4 // AGR2 // CDC20 // SPP1 // COL1A1 // CDC45 // CTHRC1
GO:0033036	P	macromolecule localization	9	72	2880	19133	0.77	1	// ECT2 // CENPF // ATP10B // AGR2 // AIM2 // COL1A1 // KDELR3 // IGF2BP3 // KIF20A
GO:0060255	P	regulation of macromolecule metabolic process	20	72	5904	19133	0.75	1	// ETV4 // CRABP2 // TYMS // HMGB3 // CENPF // MMP9 // AGR2 // TOP2A // PROM2 // AIM2 // TFAP2A // SLC50A1 // COL1A1 // CDC45 // EPCAM // CDH3 // CDC20 // IGF2BP3 // SPINK1 // CDCA7
GO:0048583	P	regulation of response to stimulus	6	72	3744	19133	1	1	// SMPDL3B // AIM2 // TNFRSF21 // SPP1 // COL1A1 // COL3A1
GO:0007600	P	sensory perception	6	72	973	19133	0.16	1	// COL11A1 // TFAP2A // GJB2 // COL1A1 // CDH3 // CST1
GO:0034645	P	cellular macromolecule biosynthetic process	17	72	5100	19133	0.76	1	// CRABP2 // ETV4 // GCNT3 // TYMS // HMGB3 // CENPF // RPL39L // AIM2 // TFAP2A // CDCA7 // COL1A1 // CDC45 // EPCAM // IGF2BP3 // TOP2A // KIAA0101 // FUT2
GO:0050776	P	regulation of immune response	5	72	957	19133	0.29	1	// SMPDL3B // COL3A1 // TNFRSF21 // AIM2 // COL1A1
GO:0043436	P	oxoacid metabolic process	7	72	1029	19133	0.093	1	// LGSN // CRABP2 // SLC7A5 // SLC2A1 // NQO1 // PSAT1 // PYCR1
GO:0010035	P	response to inorganic substance	5	72	559	19133	0.06	1	// TFAP2A // GPX2 // COL1A1 // ECT2 // NQO1
GO:0010033	P	response to organic substance	10	72	2840	19133	0.64	1	// TYMS // GJB2 // S100P // NQO1 // CHRNA5 // TNFRSF21 // SPP1 // FBXO32 // COL1A1 // COL3A1
GO:0055114	P	oxidation reduction	5	72	983	19133	0.31	1	// PYCR1 // AKR1B10 // C15orf48 // GPX2 // NQO1
GO:0051704	P	multi-organism process	6	72	2343	19133	0.89	1	// GJB2 // AIM2 // TYMS // TNFRSF21 // SPP1 // MMP9
GO:0042325	P	regulation of phosphorylation	5	72	1412	19133	0.62	1	// TPX2 // MMP9 // SPINK1 // ECT2 // PROM2
GO:0044248	P	cellular catabolic process	5	72	2169	19133	0.92	1	// SMPDL3B // AKR1B10 // FUT2 // FBXO32 // CDC20
GO:0016192	P	vesicle-mediated transport	5	72	1584	19133	0.72	1	// KDELR3 // TMPRSS4 // PROM2 // SPINK1 // KIF20A
GO:0009605	P	response to external stimulus	13	72	2840	19133	0.27	1	// SMPDL3B // COL11A1 // MMP12 // DSP // NQO1 // TYMS // TNFRSF21 // SPP1 // SLC2A1 // COL1A1 // COL3A1 // CDH3 // AIM2
GO:0048870	P	cell motility	8	72	1336	19133	0.13	1	// MMP9 // MMP12 // ASPM // SLC7A5 // S100P // SULF1 // COL1A1 // CTHRC1
GO:0019538	P	protein metabolic process	19	72	5595	19133	0.74	1	// PLPP2 // MMP11 // MMP12 // GCNT3 // RPL39L // TMPRSS4 // DSP // CDC20 // MELK // TYMS // PROM2 // FBXO32 // MMP9 // COL3A1 // IGF2BP3 // TOP2A // UBE2T // SPINK1 // FUT2
GO:0010468	P	regulation of gene expression	16	72	4476	19133	0.64	1	// ETV4 // CRABP2 // TYMS // HMGB3 // CENPF // AGR2 // AIM2 // TFAP2A // CDCA7 // COL1A1 // CDC45 // EPCAM // CDH3 // IGF2BP3 // SLC50A1 // TOP2A
GO:0002376	P	immune system process	12	72	2470	19133	0.21	1	// SMPDL3B // CCNB2 // MMP9 // GCNT3 // HMGB3 // SLC7A5 // AIM2 // MELK // TNFRSF21 // COL1A1 // COL3A1 // TOP2A
GO:0007154	P	cell communication	19	72	6489	19133	0.93	1	// SMPDL3B // MMP9 // THBS2 // CRABP2 // ECT2 // ASPM // GJB2 // AGR2 // SULF1 // NQO1 // CHRNA5 // TNFRSF21 // SLC2A1 // COL1A1 // COL3A1 // CDH3 // CDC20 // CTHRC1 // SPINK1
GO:0023051	P	regulation of signaling process	12	72	3070	19133	0.49	1	// SMPDL3B // CRABP2 // ECT2 // ASPM // MMP9 // AGR2 // SULF1 // COL1A1 // COL3A1 // CDH3 // CTHRC1 // SPINK1
GO:0033554	P	cellular response to stress	8	72	1949	19133	0.45	1	// ECT2 // GJB2 // SLC2A1 // NQO1 // SPP1 // CDC45 // KIAA0101 // TOP2A
GO:0023052	P	signaling	23	72	6572	19133	0.71	1	// NQO1 // COL3A1 // FAM83A // CRABP2 // ASPM // GJB2 // THBS2 // SULF1 // CDH3 // SPINK1 // PLPP2 // MMP9 // AIM2 // CHRNA5 // TNFRSF21 // EPCAM // SMPDL3B // ECT2 // AGR2 // SLC2A1 // CDC20 // COL1A1 // CTHRC1
GO:0044281	P	small molecule metabolic process	11	72	2678	19133	0.43	1	// AKR1B10 // LGSN // CRABP2 // SLC7A5 // SLC2A1 // NQO1 // PSAT1 // TYMS // FUT2 // PYCR1 // METTL7B
GO:0048598	P	embryonic morphogenesis	5	72	585	19133	0.07	1	// TFAP2A // CRABP2 // COL11A1 // SULF1 // CTHRC1
GO:0022607	P	cellular component assembly	8	72	2798	19133	0.84	1	// ECT2 // CENPF // GJB2 // THBS2 // SLC2A1 // AIM2 // COL1A1 // CDC45
GO:0009892	P	negative regulation of metabolic process	6	72	2569	19133	0.93	1	// TFAP2A // CENPF // CDC20 // CDC45 // IGF2BP3 // SPINK1
GO:0009893	P	positive regulation of metabolic process	11	72	3093	19133	0.63	1	// ETV4 // TFAP2A // MMP9 // AGR2 // CDC20 // PROM2 // COL1A1 // EPCAM // CDH3 // SLC50A1 // TOP2A
GO:0009891	P	positive regulation of biosynthetic process	6	72	1761	19133	0.66	1	// ETV4 // TFAP2A // COL1A1 // EPCAM // CDH3 // TOP2A
GO:0006950	P	response to stress	18	72	3867	19133	0.19	1	// SMPDL3B // MMP12 // ECT2 // HMGB3 // GJB2 // DSP // NQO1 // TNFRSF21 // GPX2 // SPP1 // SLC2A1 // COL1A1 // CDC45 // COL3A1 // CDH3 // AIM2 // KIAA0101 // TOP2A
GO:0006928	P	cellular component movement	9	72	1801	19133	0.24	1	// MMP9 // ETV4 // MMP12 // ASPM // SLC7A5 // S100P // SULF1 // COL1A1 // CTHRC1
GO:0051674	P	localization of cell	8	72	1336	19133	0.13	1	// MMP9 // MMP12 // ASPM // SLC7A5 // S100P // SULF1 // COL1A1 // CTHRC1
GO:0023034	P	intracellular signaling pathway	12	72	2569	19133	0.26	1	// SMPDL3B // CDH3 // ASPM // MMP9 // AGR2 // SULF1 // AIM2 // TNFRSF21 // COL1A1 // COL3A1 // FAM83A // CTHRC1
GO:0042981	P	regulation of apoptosis	8	72	1496	19133	0.2	1	// ECT2 // TFAP2A // NQO1 // MELK // TNFRSF21 // MMP9 // EPCAM // TOP2A
GO:0050789	P	regulation of biological process	42	72	10981	19133	0.49	1	// MMP11 // MMP12 // HMGB3 // NQO1 // COL3A1 // PRC1 // KIAA0101 // SLC50A1 // TPX2 // ECT2 // TYMS // TFAP2A // ASPM // THBS2 // SULF1 // CEACAM5 // CDCA7 // CRABP2 // CDH3 // SPINK1 // TOP2A // PLPP2 // CENPF // MMP9 // AIM2 // CHRNA5 // TNFRSF21 // PROM2 // EPCAM // IGF2BP3 // SMPDL3B // CCNB2 // ETV4 // AGR2 // SLC2A1 // CDC20 // MELK // SPP1 // COL1A1 // CDC45 // CTHRC1 // GOLM1
GO:0023033	P	signaling pathway	12	72	3857	19133	0.81	1	// SMPDL3B // CDH3 // ASPM // MMP9 // AGR2 // SULF1 // AIM2 // TNFRSF21 // COL1A1 // COL3A1 // FAM83A // CTHRC1
GO:0044267	P	cellular protein metabolic process	16	72	5085	19133	0.83	1	// PLPP2 // GCNT3 // TYMS // RPL39L // DSP // CDC20 // MELK // PROM2 // FBXO32 // MMP9 // COL3A1 // IGF2BP3 // TOP2A // UBE2T // SPINK1 // FUT2
GO:0010646	P	regulation of cell communication	15	72	3127	19133	0.19	1	// SMPDL3B // CRABP2 // ECT2 // ASPM // MMP9 // AGR2 // SULF1 // CDC20 // TNFRSF21 // SLC2A1 // COL1A1 // COL3A1 // CDH3 // CTHRC1 // SPINK1
GO:0000902	P	cell morphogenesis	5	72	1390	19133	0.61	1	// CRABP2 // SPP1 // ETV4 // ECT2 // COL1A1
GO:0044260	P	cellular macromolecule metabolic process	29	72	8698	19133	0.84	1	// COL11A1 // HMGB3 // COL3A1 // KIAA0101 // CRABP2 // TYMS // TFAP2A // SULF1 // CDCA7 // SPINK1 // TOP2A // PLPP2 // CENPF // MMP9 // DSP // AIM2 // PROM2 // EPCAM // IGF2BP3 // ETV4 // GCNT3 // RPL39L // CDC20 // MELK // FUT2 // FBXO32 // COL1A1 // CDC45 // UBE2T
GO:0016044	P	cellular membrane organization	5	72	1628	19133	0.74	1	// TMPRSS4 // ATP10B // AGR2 // PROM2 // CCNB2
GO:0006955	P	immune response	7	72	1674	19133	0.44	1	// SMPDL3B // GCNT3 // HMGB3 // AIM2 // TNFRSF21 // COL1A1 // COL3A1
GO:0065003	P	macromolecular complex assembly	6	72	1908	19133	0.74	1	// ECT2 // CENPF // SLC2A1 // AIM2 // COL1A1 // CDC45
GO:0048589	P	developmental growth	5	72	584	19133	0.07	1	// ASPM // AGR2 // SPP1 // CRABP2 // TYMS
GO:0065007	P	biological regulation	44	72	11612	19133	0.52	1	// MMP11 // MMP12 // HMGB3 // NQO1 // COL3A1 // PYCR1 // PRC1 // SLC50A1 // TPX2 // ECT2 // TYMS // TFAP2A // ASPM // THBS2 // SULF1 // CEACAM5 // CDCA7 // CRABP2 // CDH3 // SPINK1 // TOP2A // PLPP2 // CENPF // MMP9 // AIM2 // CHRNA5 // TNFRSF21 // PROM2 // EPCAM // IGF2BP3 // SMPDL3B // CCNB2 // ETV4 // AGR2 // SLC2A1 // CDC20 // MELK // SPP1 // COL1A1 // CDC45 // KDELR3 // KIAA0101 // CTHRC1 //…
GO:0045893	P	positive regulation of transcription, DNA-dependent	5	72	1349	19133	0.58	1	// TFAP2A // EPCAM // TOP2A // ETV4 // COL1A1
GO:0006366	P	transcription from RNA polymerase II promoter	6	72	2055	19133	0.8	1	// ETV4 // TFAP2A // TYMS // CDC45 // EPCAM // TOP2A
GO:0065009	P	regulation of molecular function	9	72	3002	19133	0.82	1	// TPX2 // ECT2 // AIM2 // PROM2 // MMP9 // CDH3 // NQO1 // CTHRC1 // CDC20
GO:0065008	P	regulation of biological quality	16	72	3874	19133	0.38	1	// CCNB2 // CRABP2 // ECT2 // KDELR3 // AGR2 // COL1A1 // THBS2 // SLC2A1 // CDC20 // TYMS // TNFRSF21 // SPP1 // ASPM // COL3A1 // PYCR1 // CDH3
GO:0048646	P	anatomical structure formation involved in morphogenesis	5	72	1206	19133	0.48	1	// TFAP2A // THBS2 // CTHRC1 // SULF1 // COL1A1
GO:0016265	P	death	13	72	2031	19133	0.039	1	// TPX2 // ECT2 // TFAP2A // AGR2 // SULF1 // NQO1 // MELK // TNFRSF21 // CDCA7 // MMP9 // EPCAM // AIM2 // TOP2A
GO:0009719	P	response to endogenous stimulus	7	72	1616	19133	0.41	1	// GJB2 // NQO1 // TYMS // SPP1 // FBXO32 // COL1A1 // COL3A1
GO:0006915	P	apoptosis	12	72	1886	19133	0.049	1	// TPX2 // ECT2 // TFAP2A // SULF1 // NQO1 // MELK // TNFRSF21 // CDCA7 // MMP9 // EPCAM // AIM2 // TOP2A
GO:0006629	P	lipid metabolic process	6	72	1366	19133	0.41	1	// SMPDL3B // PLPP2 // CRABP2 // SERINC2 // AKR1B10 // GOLM1
GO:0009308	P	amine metabolic process	5	72	746	19133	0.15	1	// PSAT1 // PYCR1 // SLC7A5 // LGSN // NQO1
GO:0050767	P	regulation of neurogenesis	6	72	682	19133	0.044	1	// ECT2 // CRABP2 // ASPM // CDC20 // TNFRSF21 // SPP1
GO:0003008	P	system process	14	72	2510	19133	0.084	1	// COL11A1 // GCNT3 // TFAP2A // GJB2 // THBS2 // SULF1 // NQO1 // CHRNA5 // TNFRSF21 // FBXO32 // COL1A1 // CDH3 // CST1 // CDC20
GO:0050790	P	regulation of catalytic activity	6	72	2503	19133	0.92	1	// TPX2 // ECT2 // CDC20 // PROM2 // CDH3 // NQO1
GO:0009889	P	regulation of biosynthetic process	14	72	4431	19133	0.81	1	// ETV4 // CRABP2 // TYMS // HMGB3 // CENPF // AIM2 // TFAP2A // CDCA7 // COL1A1 // CDC45 // EPCAM // CDH3 // IGF2BP3 // TOP2A
GO:0051716	P	cellular response to stimulus	12	72	7038	19133	1	1	// ECT2 // TFAP2A // GJB2 // SLC2A1 // NQO1 // SPP1 // FBXO32 // COL1A1 // CDC45 // COL3A1 // KIAA0101 // TOP2A
GO:0042060	P	wound healing	5	72	545	19133	0.055	1	// COL3A1 // CDH3 // DSP // MMP12 // COL1A1
GO:0050794	P	regulation of cellular process	40	72	10588	19133	0.53	1	// MMP11 // MMP12 // HMGB3 // NQO1 // COL3A1 // PRC1 // KIAA0101 // TPX2 // ECT2 // TYMS // TFAP2A // ASPM // THBS2 // SULF1 // CEACAM5 // CDCA7 // CRABP2 // CDH3 // SPINK1 // TOP2A // PLPP2 // CENPF // MMP9 // AIM2 // CHRNA5 // TNFRSF21 // PROM2 // EPCAM // IGF2BP3 // SMPDL3B // CCNB2 // ETV4 // AGR2 // SLC2A1 // CDC20 // MELK // SPP1 // COL1A1 // CDC45 // CTHRC1
GO:0006952	P	defense response	5	72	1568	19133	0.71	1	// HMGB3 // SMPDL3B // TNFRSF21 // SPP1 // AIM2
GO:0012501	P	programmed cell death	12	72	1908	19133	0.053	1	// TPX2 // ECT2 // TFAP2A // SULF1 // NQO1 // MELK // TNFRSF21 // CDCA7 // MMP9 // EPCAM // AIM2 // TOP2A
GO:0043412	P	macromolecule modification	13	72	4078	19133	0.79	1	// PLPP2 // GCNT3 // DSP // CDC20 // MELK // PROM2 // FBXO32 // MMP9 // COL3A1 // TOP2A // UBE2T // SPINK1 // FUT2
GO:0051234	P	establishment of localization	19	72	4872	19133	0.47	1	// CLDN10 // SLC7A5 // CRABP2 // ECT2 // CENPF // ATP10B // GJB2 // AGR2 // SLC2A1 // AIM2 // SPINK1 // TMPRSS4 // COL1A1 // KDELR3 // IGF2BP3 // SERINC2 // KIF20A // SLC50A1 // PROM2
GO:0000003	P	reproduction	9	72	1839	19133	0.25	1	// ASPM // GJB2 // RPL39L // SULF1 // TYMS // SPP1 // MMP9 // SPINK1 // TOP2A
GO:0016070	P	RNA metabolic process	11	72	4716	19133	0.98	1	// ETV4 // CRABP2 // TYMS // HMGB3 // CENPF // TFAP2A // CDCA7 // COL1A1 // CDC45 // EPCAM // TOP2A
GO:0031667	P	response to nutrient levels	5	72	690	19133	0.12	1	// TYMS // COL1A1 // SPP1 // SLC2A1 // NQO1
GO:0044271	P	cellular nitrogen compound biosynthetic process	5	72	5036	19133	1	1	// PSAT1 // TYMS // PYCR1 // LGSN // NQO1
GO:0050896	P	response to stimulus	27	72	8527	19133	0.91	1	// COL11A1 // MMP12 // HMGB3 // S100P // NQO1 // COL3A1 // KIAA0101 // ECT2 // TFAP2A // GJB2 // CDH3 // CST1 // TOP2A // CENPF // DSP // AIM2 // CHRNA5 // TNFRSF21 // SMPDL3B // GCNT3 // SLC2A1 // TYMS // GPX2 // SPP1 // FBXO32 // COL1A1 // CDC45
GO:0050890	P	cognition	6	72	1184	19133	0.29	1	// COL11A1 // TFAP2A // GJB2 // COL1A1 // CDH3 // CST1
GO:0006355	P	regulation of transcription, DNA-dependent	11	72	3603	19133	0.82	1	// ETV4 // CRABP2 // TYMS // HMGB3 // CENPF // TFAP2A // CDCA7 // COL1A1 // CDC45 // EPCAM // TOP2A
GO:0010557	P	positive regulation of macromolecule biosynthetic process	5	72	1597	19133	0.73	1	// TFAP2A // EPCAM // TOP2A // ETV4 // COL1A1
GO:0006357	P	regulation of transcription from RNA polymerase II promoter	6	72	1851	19133	0.71	1	// ETV4 // TFAP2A // TYMS // CDC45 // EPCAM // TOP2A
GO:0006350	P	transcription	12	72	3876	19133	0.82	1	// ETV4 // CRABP2 // TYMS // HMGB3 // CENPF // AIM2 // TFAP2A // CDCA7 // COL1A1 // CDC45 // EPCAM // TOP2A
GO:0006351	P	transcription, DNA-dependent	11	72	3766	19133	0.86	1	// ETV4 // CRABP2 // TYMS // HMGB3 // CENPF // TFAP2A // CDCA7 // COL1A1 // CDC45 // EPCAM // TOP2A
GO:0009967	P	positive regulation of signal transduction	8	72	1428	19133	0.17	1	// ECT2 // ASPM // MMP9 // AGR2 // SULF1 // COL1A1 // COL3A1 // CDH3
GO:0006519	P	cellular amino acid and derivative metabolic process	5	72	660	19133	0.1	1	// PSAT1 // PYCR1 // SLC7A5 // LGSN // NQO1
GO:0070271	P	protein complex biogenesis	5	72	1664	19133	0.76	1	// CENPF // AIM2 // SLC2A1 // ECT2 // COL1A1
GO:0016310	P	phosphorylation	6	72	2269	19133	0.87	1	// TPX2 // ECT2 // MELK // PROM2 // MMP9 // SPINK1
GO:0051128	P	regulation of cellular component organization	12	72	2335	19133	0.16	1	// TPX2 // CRABP2 // ECT2 // AGR2 // MMP9 // THBS2 // AIM2 // SPP1 // PROM2 // COL1A1 // CENPF // CDC20
GO:0023056	P	positive regulation of signaling process	8	72	1563	19133	0.23	1	// ECT2 // ASPM // MMP9 // AGR2 // SULF1 // COL1A1 // COL3A1 // CDH3
GO:0034641	P	cellular nitrogen compound metabolic process	6	72	6713	19133	1	1	// LGSN // SLC7A5 // NQO1 // PSAT1 // TYMS // PYCR1
GO:0070887	P	cellular response to chemical stimulus	7	72	2710	19133	0.9	1	// ECT2 // TFAP2A // GJB2 // NQO1 // FBXO32 // COL1A1 // COL3A1
GO:0016477	P	cell migration	8	72	1230	19133	0.091	1	// MMP9 // MMP12 // ASPM // SLC7A5 // S100P // SULF1 // COL1A1 // CTHRC1
GO:0061061	P	muscle structure development	5	72	652	19133	0.1	1	// COL3A1 // CEACAM5 // COL11A1 // DSP // CENPF
GO:0010647	P	positive regulation of cell communication	8	72	1581	19133	0.24	1	// ECT2 // ASPM // MMP9 // AGR2 // SULF1 // COL1A1 // COL3A1 // CDH3
GO:0007417	P	central nervous system development	6	72	907	19133	0.13	1	// TFAP2A // CENPF // PCP4 // TNFRSF21 // ASPM // COL3A1
GO:0006139	P	nucleobase, nucleoside, nucleotide and nucleic acid metabolic process	13	72	5937	19133	1	1	// ETV4 // CRABP2 // TYMS // HMGB3 // CENPF // AIM2 // TFAP2A // CDCA7 // COL1A1 // CDC45 // EPCAM // KIAA0101 // TOP2A
GO:0051649	P	establishment of localization in cell	6	72	2837	19133	0.97	1	// ECT2 // CENPF // SLC2A1 // AIM2 // KDELR3 // SPINK1
GO:0044106	P	cellular amine metabolic process	5	72	511	19133	0.044	1	// PSAT1 // PYCR1 // SLC7A5 // LGSN // NQO1
GO:0022603	P	regulation of anatomical structure morphogenesis	8	72	1077	19133	0.05	1	// ETV4 // CRABP2 // TFAP2A // THBS2 // SULF1 // SPP1 // COL1A1 // CTHRC1
GO:0051246	P	regulation of protein metabolic process	6	72	2518	19133	0.92	1	// CDC20 // TYMS // PROM2 // MMP9 // IGF2BP3 // SPINK1
GO:0030030	P	cell projection organization	6	72	1302	19133	0.37	1	// ETV4 // CRABP2 // CDC20 // SPP1 // PROM2 // CTHRC1
GO:0006810	P	transport	19	72	4743	19133	0.42	1	// CLDN10 // SLC7A5 // CRABP2 // ECT2 // CENPF // ATP10B // GJB2 // AGR2 // SLC2A1 // AIM2 // SPINK1 // TMPRSS4 // COL1A1 // KDELR3 // IGF2BP3 // SERINC2 // KIF20A // SLC50A1 // PROM2
GO:0006508	P	proteolysis	5	72	1724	19133	0.79	1	// FBXO32 // TMPRSS4 // MMP11 // MMP12 // CDC20
GO:0002520	P	immune system development	5	72	823	19133	0.2	1	// HMGB3 // MELK // MMP9 // TOP2A // CCNB2
GO:0043067	P	regulation of programmed cell death	8	72	1509	19133	0.21	1	// ECT2 // TFAP2A // NQO1 // MELK // TNFRSF21 // MMP9 // EPCAM // TOP2A
GO:0008284	P	positive regulation of cell proliferation	6	72	849	19133	0.1	1	// MMP12 // ASPM // CTHRC1 // CDH3 // CDC20 // PRC1
GO:0006996	P	organelle organization	14	72	3779	19133	0.57	1	// CCNB2 // TPX2 // KIF20A // ECT2 // ASPM // MMP9 // DSP // CDC20 // GOLM1 // CENPF // PRC1 // TOP2A // KIAA0101 // PLEK2
GO:0045184	P	establishment of protein localization	7	72	2031	19133	0.65	1	// ECT2 // CENPF // AGR2 // AIM2 // COL1A1 // KDELR3 // KIF20A
GO:0050877	P	neurological system process	11	72	1851	19133	0.086	1	// COL11A1 // TFAP2A // GJB2 // THBS2 // NQO1 // CHRNA5 // TNFRSF21 // COL1A1 // CDH3 // CST1 // CDC20
GO:0043687	P	post-translational protein modification	11	72	3414	19133	0.76	1	// PLPP2 // DSP // CDC20 // MELK // PROM2 // FBXO32 // MMP9 // COL3A1 // UBE2T // SPINK1 // TOP2A
GO:0060429	P	epithelium development	8	72	1071	19133	0.048	1	// ETV4 // TFAP2A // AGR2 // DSP // TYMS // SULF1 // CDH3 // CTHRC1
GO:0045597	P	positive regulation of cell differentiation	5	72	841	19133	0.21	1	// ASPM // CRABP2 // CTHRC1 // ECT2 // COL1A1
GO:0045596	P	negative regulation of cell differentiation	5	72	732	19133	0.14	1	// HMGB3 // ASPM // CEACAM5 // MMP11 // SPP1
GO:0023046	P	signaling process	22	72	6369	19133	0.73	1	// NQO1 // COL3A1 // CRABP2 // ASPM // GJB2 // THBS2 // SULF1 // CDH3 // SPINK1 // PLPP2 // COL1A1 // AIM2 // CHRNA5 // TNFRSF21 // EPCAM // SMPDL3B // ECT2 // AGR2 // SLC2A1 // CDC20 // MMP9 // CTHRC1
GO:0032879	P	regulation of localization	9	72	2502	19133	0.61	1	// ECT2 // MMP9 // AGR2 // SULF1 // AIM2 // PROM2 // COL1A1 // SLC2A1 // SPINK1
GO:0032268	P	regulation of cellular protein metabolic process	6	72	2352	19133	0.89	1	// CDC20 // TYMS // PROM2 // MMP9 // IGF2BP3 // SPINK1
GO:0006082	P	organic acid metabolic process	7	72	1054	19133	0.1	1	// LGSN // CRABP2 // SLC7A5 // SLC2A1 // NQO1 // PSAT1 // PYCR1
GO:0009725	P	response to hormone stimulus	6	72	953	19133	0.15	1	// GJB2 // NQO1 // TYMS // SPP1 // FBXO32 // COL1A1
GO:0051252	P	regulation of RNA metabolic process	11	72	3855	19133	0.88	1	// ETV4 // CRABP2 // TYMS // HMGB3 // CENPF // TFAP2A // CDCA7 // COL1A1 // CDC45 // EPCAM // TOP2A
GO:0051254	P	positive regulation of RNA metabolic process	5	72	1415	19133	0.62	1	// TFAP2A // EPCAM // TOP2A // ETV4 // COL1A1
GO:0043170	P	macromolecule metabolic process	36	72	9381	19133	0.48	1	// COL10A1 // COL11A1 // MMP12 // HMGB3 // RPL39L // COL3A1 // KIAA0101 // SLC50A1 // MMP11 // GCNT3 // TYMS // TFAP2A // SULF1 // CDCA7 // CRABP2 // CDH3 // SPINK1 // TOP2A // PLPP2 // CENPF // MMP9 // TMPRSS4 // DSP // AIM2 // PROM2 // EPCAM // IGF2BP3 // ETV4 // AGR2 // CDC20 // MELK // FUT2 // FBXO32 // COL1A1 // CDC45 // UBE2T
GO:0045941	P	positive regulation of transcription	5	72	1369	19133	0.59	1	// TFAP2A // EPCAM // TOP2A // ETV4 // COL1A1
GO:0006807	P	nitrogen compound metabolic process	18	72	7065	19133	0.99	1	// LGSN // ETV4 // CRABP2 // TYMS // HMGB3 // CENPF // SLC7A5 // NQO1 // PSAT1 // TFAP2A // CDCA7 // COL1A1 // CDC45 // EPCAM // PYCR1 // AIM2 // KIAA0101 // TOP2A
GO:0051130	P	positive regulation of cellular component organization	8	72	1184	19133	0.077	1	// CRABP2 // AGR2 // MMP9 // THBS2 // AIM2 // PROM2 // COL1A1 // CDC20
GO:0009991	P	response to extracellular stimulus	5	72	720	19133	0.14	1	// TYMS // COL1A1 // SPP1 // SLC2A1 // NQO1
GO:0031328	P	positive regulation of cellular biosynthetic process	6	72	1729	19133	0.64	1	// ETV4 // TFAP2A // COL1A1 // EPCAM // CDH3 // TOP2A
GO:0043933	P	macromolecular complex subunit organization	6	72	2705	19133	0.95	1	// ECT2 // CENPF // SLC2A1 // AIM2 // COL1A1 // CDC45
GO:0031326	P	regulation of cellular biosynthetic process	14	72	4382	19133	0.8	1	// ETV4 // CRABP2 // TYMS // HMGB3 // CENPF // AIM2 // TFAP2A // CDCA7 // COL1A1 // CDC45 // EPCAM // CDH3 // IGF2BP3 // TOP2A
GO:0031325	P	positive regulation of cellular metabolic process	9	72	2878	19133	0.77	1	// ETV4 // TFAP2A // MMP9 // CDC20 // PROM2 // COL1A1 // EPCAM // CDH3 // TOP2A
GO:0031324	P	negative regulation of cellular metabolic process	6	72	2392	19133	0.9	1	// TFAP2A // CENPF // CDC20 // CDC45 // IGF2BP3 // SPINK1
GO:0031323	P	regulation of cellular metabolic process	21	72	6063	19133	0.72	1	// CRABP2 // TPX2 // ETV4 // ECT2 // TYMS // HMGB3 // CENPF // MMP9 // CDC20 // TOP2A // NQO1 // TFAP2A // CDCA7 // COL1A1 // CDC45 // EPCAM // CDH3 // AIM2 // IGF2BP3 // SPINK1 // PROM2
GO:0019752	P	carboxylic acid metabolic process	7	72	1024	19133	0.091	1	// LGSN // CRABP2 // SLC7A5 // SLC2A1 // NQO1 // PSAT1 // PYCR1
GO:0042592	P	homeostatic process	5	72	1931	19133	0.86	1	// CCNB2 // PYCR1 // TNFRSF21 // CDH3 // SPP1
GO:0045449	P	regulation of transcription	12	72	3622	19133	0.73	1	// ETV4 // CRABP2 // TYMS // HMGB3 // CENPF // AIM2 // TFAP2A // CDCA7 // COL1A1 // CDC45 // EPCAM // TOP2A
GO:0010942	P	positive regulation of cell death	5	72	778	19133	0.17	1	// TFAP2A // MELK // TOP2A // ECT2 // NQO1
GO:0008219	P	cell death	13	72	2031	19133	0.039	1	// TPX2 // ECT2 // TFAP2A // AGR2 // SULF1 // NQO1 // MELK // TNFRSF21 // CDCA7 // MMP9 // EPCAM // AIM2 // TOP2A
GO:0010941	P	regulation of cell death	9	72	1601	19133	0.15	1	// ECT2 // TFAP2A // AGR2 // NQO1 // MELK // TNFRSF21 // MMP9 // EPCAM // TOP2A
GO:0010628	P	positive regulation of gene expression	8	72	1692	19133	0.3	1	// ETV4 // TFAP2A // AGR2 // COL1A1 // EPCAM // CDH3 // SLC50A1 // TOP2A
GO:0009653	P	anatomical structure morphogenesis	16	72	2847	19133	0.062	1	// COL10A1 // CRABP2 // COL11A1 // GCNT3 // ECT2 // TFAP2A // THBS2 // AGR2 // SULF1 // SPP1 // DSP // COL1A1 // COL3A1 // IGF2BP3 // CTHRC1 // ETV4
GO:0002682	P	regulation of immune system process	6	72	1379	19133	0.42	1	// SMPDL3B // HMGB3 // AIM2 // TNFRSF21 // COL1A1 // COL3A1
GO:0040007	P	growth	6	72	987	19133	0.17	1	// CCNB2 // CRABP2 // ASPM // AGR2 // TYMS // SPP1
GO:0032989	P	cellular component morphogenesis	5	72	1543	19133	0.7	1	// CRABP2 // SPP1 // ETV4 // ECT2 // COL1A1
GO:0043065	P	positive regulation of apoptosis	5	72	748	19133	0.15	1	// TFAP2A // MELK // TOP2A // ECT2 // NQO1
GO:0010467	P	gene expression	17	72	5626	19133	0.89	1	// RPL39L // ETV4 // CRABP2 // TYMS // HMGB3 // CENPF // AGR2 // AIM2 // TFAP2A // CDCA7 // COL1A1 // CDC45 // EPCAM // CDH3 // IGF2BP3 // SLC50A1 // TOP2A
GO:0048534	P	hemopoietic or lymphoid organ development	5	72	778	19133	0.17	1	// HMGB3 // MELK // MMP9 // TOP2A // CCNB2
GO:0043068	P	positive regulation of programmed cell death	5	72	752	19133	0.15	1	// TFAP2A // MELK // TOP2A // ECT2 // NQO1
GO:0048666	P	neuron development	5	72	978	19133	0.31	1	// CDC20 // SPP1 // CTHRC1 // CRABP2 // ETV4
GO:0045935	P	positive regulation of nucleobase, nucleoside, nucleotide and nucleic acid metabolic process	5	72	1667	19133	0.76	1	// TFAP2A // EPCAM // TOP2A // ETV4 // COL1A1
GO:0030182	P	neuron differentiation	7	72	1233	19133	0.18	1	// ECT2 // CRABP2 // ASPM // CDC20 // SPP1 // CTHRC1 // ETV4
GO:0019219	P	regulation of nucleobase, nucleoside, nucleotide and nucleic acid metabolic process	12	72	4280	19133	0.91	1	// ETV4 // CRABP2 // TYMS // HMGB3 // CENPF // AIM2 // TFAP2A // CDCA7 // COL1A1 // CDC45 // EPCAM // TOP2A
GO:0006461	P	protein complex assembly	5	72	1663	19133	0.76	1	// CENPF // AIM2 // SLC2A1 // ECT2 // COL1A1
GO:0006464	P	protein modification process	13	72	3824	19133	0.7	1	// PLPP2 // GCNT3 // DSP // CDC20 // MELK // PROM2 // FBXO32 // MMP9 // COL3A1 // TOP2A // UBE2T // SPINK1 // FUT2
GO:0023060	P	signal transmission	22	72	6339	19133	0.72	1	// NQO1 // COL3A1 // CRABP2 // ASPM // GJB2 // THBS2 // SULF1 // CDH3 // SPINK1 // PLPP2 // COL1A1 // AIM2 // CHRNA5 // TNFRSF21 // EPCAM // SMPDL3B // ECT2 // AGR2 // SLC2A1 // CDC20 // MMP9 // CTHRC1
GO:0051174	P	regulation of phosphorus metabolic process	5	72	1629	19133	0.74	1	// TPX2 // MMP9 // SPINK1 // ECT2 // PROM2
GO:0022414	P	reproductive process	9	72	1837	19133	0.25	1	// ASPM // GJB2 // RPL39L // SULF1 // TYMS // SPP1 // MMP9 // SPINK1 // TOP2A
GO:0009058	P	biosynthetic process	24	72	6434	19133	0.57	1	// HMGB3 // NQO1 // PYCR1 // KIAA0101 // LGSN // CRABP2 // GCNT3 // TFAP2A // CDCA7 // CDH3 // TOP2A // PLPP2 // CENPF // AIM2 // EPCAM // IGF2BP3 // ETV4 // RPL39L // SLC2A1 // PSAT1 // TYMS // FUT2 // COL1A1 // CDC45
GO:0009059	P	macromolecule biosynthetic process	17	72	5194	19133	0.79	1	// CRABP2 // ETV4 // GCNT3 // TYMS // HMGB3 // CENPF // RPL39L // AIM2 // TFAP2A // CDCA7 // COL1A1 // CDC45 // EPCAM // IGF2BP3 // TOP2A // KIAA0101 // FUT2
GO:0022411	P	cellular component disassembly	5	72	610	19133	0.081	1	// CCNB2 // SPP1 // MMP11 // MMP12 // MMP9
GO:0051171	P	regulation of nitrogen compound metabolic process	13	72	4519	19133	0.9	1	// ETV4 // CRABP2 // TYMS // HMGB3 // CENPF // NQO1 // TFAP2A // CDCA7 // COL1A1 // CDC45 // EPCAM // AIM2 // TOP2A
GO:0051173	P	positive regulation of nitrogen compound metabolic process	5	72	1775	19133	0.81	1	// TFAP2A // EPCAM // TOP2A // ETV4 // COL1A1
GO:0007155	P	cell adhesion	9	72	1729	19133	0.2	1	// CLDN10 // COL11A1 // AGR2 // THBS2 // CEACAM5 // SPP1 // COL1A1 // COL3A1 // CDH3
GO:0042221	P	response to chemical stimulus	16	72	4218	19133	0.53	1	// ECT2 // TYMS // TFAP2A // CENPF // GJB2 // S100P // NQO1 // CHRNA5 // TNFRSF21 // GPX2 // SPP1 // FBXO32 // COL1A1 // COL3A1 // CDH3 // CST1
GO:0022008	P	neurogenesis	8	72	1448	19133	0.18	1	// ECT2 // CRABP2 // ASPM // CDC20 // TNFRSF21 // SPP1 // CTHRC1 // ETV4
GO:0009056	P	catabolic process	5	72	2458	19133	0.96	1	// SMPDL3B // AKR1B10 // FUT2 // FBXO32 // CDC20
GO:0051179	P	localization	25	72	5945	19133	0.29	1	// CLDN10 // MMP12 // SLC7A5 // S100P // SERINC2 // SLC50A1 // ECT2 // ASPM // GJB2 // SULF1 // SPINK1 // CENPF // ATP10B // MMP9 // TMPRSS4 // AIM2 // PROM2 // IGF2BP3 // CRABP2 // AGR2 // SLC2A1 // COL1A1 // KDELR3 // CTHRC1 // KIF20A
GO:0051641	P	cellular localization	8	72	3276	19133	0.94	1	// ECT2 // ASPM // SLC2A1 // AIM2 // COL1A1 // KDELR3 // CENPF // SPINK1
GO:0040011	P	locomotion	8	72	1624	19133	0.27	1	// MMP9 // MMP12 // ASPM // SLC7A5 // S100P // SULF1 // COL1A1 // CTHRC1
GO:0044238	P	primary metabolic process	40	72	10578	19133	0.53	1	// MMP11 // MMP12 // HMGB3 // SLC7A5 // NQO1 // COL3A1 // PYCR1 // KIAA0101 // AKR1B10 // LGSN // GCNT3 // TYMS // TFAP2A // CDCA7 // CRABP2 // SPINK1 // TOP2A // PLPP2 // CENPF // MMP9 // TMPRSS4 // DSP // AIM2 // PROM2 // EPCAM // IGF2BP3 // SERINC2 // SMPDL3B // ETV4 // RPL39L // SLC2A1 // CDC20 // PSAT1 // MELK // FUT2 // FBXO32 // COL1A1 // CDC45 // UBE2T // GOLM1
GO:0048699	P	generation of neurons	8	72	1358	19133	0.14	1	// ECT2 // CRABP2 // ASPM // CDC20 // TNFRSF21 // SPP1 // CTHRC1 // ETV4
GO:0007017	P	microtubule-based process	5	72	650	19133	0.099	1	// KIAA0101 // TPX2 // PRC1 // ECT2 // KIF20A
GO:0007010	P	cytoskeleton organization	7	72	1180	19133	0.16	1	// TPX2 // ECT2 // DSP // KIAA0101 // KIF20A // PRC1 // PLEK2
GO:0042180	P	cellular ketone metabolic process	7	72	1080	19133	0.11	1	// LGSN // CRABP2 // SLC7A5 // SLC2A1 // NQO1 // PSAT1 // PYCR1
GO:0051726	P	regulation of cell cycle	7	72	1009	19133	0.086	1	// CCNB2 // TPX2 // ASPM // CDC20 // CENPF // CDC45 // KIAA0101
GO:0022610	P	biological adhesion	9	72	1735	19133	0.2	1	// CLDN10 // COL11A1 // AGR2 // THBS2 // CEACAM5 // SPP1 // COL1A1 // COL3A1 // CDH3
GO:0044237	P	cellular metabolic process	42	72	10607	19133	0.36	1	// COL11A1 // HMGB3 // SLC7A5 // NQO1 // COL3A1 // PYCR1 // KIAA0101 // TPX2 // AKR1B10 // LGSN // GCNT3 // TYMS // TFAP2A // SULF1 // CDCA7 // CRABP2 // CDH3 // METTL7B // FUT2 // PLPP2 // CENPF // MMP9 // DSP // AIM2 // PROM2 // EPCAM // IGF2BP3 // SERINC2 // ETV4 // SMPDL3B // ECT2 // RPL39L // SLC2A1 // CDC20 // PSAT1 // MELK // SPINK1 // FBXO32 // COL1A1 // CDC45 // TOP2A // UBE2T
GO:0006796	P	phosphate metabolic process	7	72	3088	19133	0.96	1	// TPX2 // PLPP2 // ECT2 // MELK // PROM2 // MMP9 // SPINK1
GO:0044085	P	cellular component biogenesis	8	72	3073	19133	0.91	1	// ECT2 // CENPF // GJB2 // THBS2 // SLC2A1 // AIM2 // COL1A1 // CDC45
GO:0007267	P	cell-cell signaling	6	72	1648	19133	0.59	1	// GJB2 // THBS2 // SLC2A1 // CDC20 // CHRNA5 // NQO1
GO:0006793	P	phosphorus metabolic process	7	72	3094	19133	0.96	1	// TPX2 // PLPP2 // ECT2 // MELK // PROM2 // MMP9 // SPINK1
GO:0015031	P	protein transport	6	72	1884	19133	0.72	1	// ECT2 // CENPF // AIM2 // COL1A1 // KDELR3 // KIF20A
GO:0044249	P	cellular biosynthetic process	24	72	6321	19133	0.52	1	// HMGB3 // NQO1 // PYCR1 // KIAA0101 // LGSN // CRABP2 // GCNT3 // TFAP2A // CDCA7 // CDH3 // TOP2A // PLPP2 // CENPF // AIM2 // EPCAM // IGF2BP3 // ETV4 // RPL39L // SLC2A1 // PSAT1 // TYMS // FUT2 // COL1A1 // CDC45
GO:0048523	P	negative regulation of cellular process	21	72	4342	19133	0.12	1	// SMPDL3B // MMP11 // HMGB3 // ASPM // COL1A1 // AGR2 // SULF1 // NQO1 // TFAP2A // TNFRSF21 // CEACAM5 // PROM2 // SPP1 // CENPF // CDC45 // EPCAM // IGF2BP3 // CDC20 // CTHRC1 // SPINK1 // ETV4
GO:0048522	P	positive regulation of cellular process	22	72	4841	19133	0.19	1	// MMP12 // NQO1 // COL3A1 // PRC1 // CRABP2 // TFAP2A // ASPM // THBS2 // SULF1 // CDH3 // TOP2A // COL1A1 // AIM2 // PROM2 // EPCAM // ETV4 // ECT2 // AGR2 // CDC20 // MELK // MMP9 // CTHRC1
GO:0042802	F	identical protein binding	15	72	1358	19133	0.00014	0.019	// CLDN10 // ECT2 // TFAP2A // CENPF // MMP9 // AGR2 // SLC2A1 // NQO1 // TYMS // CEACAM5 // COL1A1 // PYCR1 // AIM2 // PRC1 // TOP2A
GO:0019901	F	protein kinase binding	6	72	531	19133	0.015	0.46	// TPX2 // DSP // FAM83A // TOP2A // PRC1 // KIF20A
GO:0019900	F	kinase binding	7	72	609	19133	0.0082	0.46	// TPX2 // SLC2A1 // DSP // FAM83A // KIF20A // PRC1 // TOP2A
GO:0005509	F	calcium ion binding	7	72	717	19133	0.019	0.46	// MMP11 // MMP12 // THBS2 // S100P // SULF1 // MELK // CDH3
GO:0042803	F	protein homodimerization activity	7	72	730	19133	0.02	0.46	// ECT2 // TFAP2A // CENPF // AGR2 // TYMS // CEACAM5 // TOP2A
GO:0003682	F	chromatin binding	6	72	504	19133	0.012	0.46	// TFAP2A // CENPF // CDC45 // KIAA0101 // UBE2T // TOP2A
GO:0005198	F	structural molecule activity	7	72	782	19133	0.028	0.47	// CLDN10 // COL11A1 // RPL39L // DSP // LAD1 // COL1A1 // COL3A1
GO:0005215	F	transporter activity	10	72	1328	19133	0.027	0.47	// GJB2 // CRABP2 // ATP10B // SLC7A5 // SLC2A1 // SERINC2 // CHRNA5 // C15orf48 // SLC50A1 // KIF20A
GO:0005515	F	protein binding	49	72	10936	19133	0.039	0.58	// COL10A1 // CLDN10 // COL11A1 // HMGB3 // RPL39L // S100P // NQO1 // UBE2T // COL3A1 // PYCR1 // FAM83A // TPX2 // AKR1B10 // ECT2 // TYMS // TFAP2A // ASPM // THBS2 // CEACAM5 // CRABP2 // CST1 // SPINK1 // TOP2A // PLPP2 // CENPF // ATP10B // MMP9 // TMPRSS4 // DSP // AIM2 // CHRNA5 // TNFRSF21 // GOLM1 // EPCAM // IGF2BP3 // PRC1 // ETV4 // PCP4 // AGR2 // SLC2A1 // CDC20 // MELK // SPP1 // …
GO:0019899	F	enzyme binding	11	72	1800	19133	0.074	0.99	// TPX2 // KIF20A // ECT2 // DSP // CDC20 // UBE2T // SLC2A1 // FAM83A // CST1 // PRC1 // TOP2A
GO:0016491	F	oxidoreductase activity	5	72	757	19133	0.16	1	// PYCR1 // AKR1B10 // C15orf48 // GPX2 // NQO1
GO:0043169	F	cation binding	15	72	4231	19133	0.65	1	// COL10A1 // SMPDL3B // MMP11 // MMP12 // ATP10B // MMP9 // THBS2 // S100P // SULF1 // MELK // COL1A1 // COL3A1 // CDH3 // TOP2A // COL11A1
GO:0000166	F	nucleotide binding	8	72	2389	19133	0.69	1	// TPX2 // TYMS // ATP10B // MELK // IGF2BP3 // KIF20A // UBE2T // TOP2A
GO:0016740	F	transferase activity	7	72	2453	19133	0.83	1	// CCNB2 // GCNT3 // TYMS // PSAT1 // MELK // FUT2 // METTL7B
GO:0005488	F	binding	57	72	14499	19133	0.3	1	// COL10A1 // CLDN10 // COL11A1 // MMP12 // HMGB3 // RPL39L // SLC7A5 // S100P // NQO1 // UBE2T // COL3A1 // PYCR1 // FAM83A // MMP11 // TPX2 // AKR1B10 // ECT2 // TYMS // TFAP2A // ASPM // THBS2 // SULF1 // CEACAM5 // CRABP2 // CDH3 // CST1 // SPINK1 // TOP2A // PLPP2 // CENPF // ATP10B // MMP9 // TMPRSS4 // DSP // AIM2 // CHRNA5 // TNFRSF21 // PROM2 // EPCAM // IGF2BP3 // PRC1 // SMPDL3B // ETV…
GO:0003676	F	nucleic acid binding	7	72	4154	19133	1	1	// HMGB3 // RPL39L // AIM2 // TYMS // CDC45 // IGF2BP3 // TOP2A
GO:0017076	F	purine nucleotide binding	6	72	1975	19133	0.77	1	// TPX2 // ATP10B // MELK // TOP2A // UBE2T // KIF20A
GO:0005524	F	ATP binding	6	72	1495	19133	0.5	1	// TPX2 // ATP10B // MELK // TOP2A // UBE2T // KIF20A
GO:0022892	F	substrate-specific transporter activity	7	72	1146	19133	0.14	1	// ATP10B // SLC7A5 // SLC2A1 // SERINC2 // CHRNA5 // C15orf48 // SLC50A1
GO:0003824	F	catalytic activity	25	72	6018	19133	0.32	1	// MMP11 // MMP12 // NQO1 // PYCR1 // AKR1B10 // LGSN // GCNT3 // TYMS // SULF1 // METTL7B // TOP2A // PLPP2 // ATP10B // TMPRSS4 // C15orf48 // SMPDL3B // CCNB2 // PSAT1 // MELK // GPX2 // FUT2 // FBXO32 // MMP9 // CDC45 // KIF20A
GO:0046872	F	metal ion binding	15	72	4184	19133	0.63	1	// COL10A1 // SMPDL3B // MMP11 // MMP12 // ATP10B // MMP9 // THBS2 // S100P // SULF1 // MELK // COL1A1 // COL3A1 // CDH3 // TOP2A // COL11A1
GO:0032555	F	purine ribonucleotide binding	6	72	1884	19133	0.72	1	// TPX2 // ATP10B // MELK // TOP2A // UBE2T // KIF20A
GO:0046983	F	protein dimerization activity	7	72	1160	19133	0.15	1	// ECT2 // TFAP2A // CENPF // AGR2 // TYMS // CEACAM5 // TOP2A
GO:0032553	F	ribonucleotide binding	6	72	1900	19133	0.73	1	// TPX2 // ATP10B // MELK // TOP2A // UBE2T // KIF20A
GO:0043167	F	ion binding	15	72	4404	19133	0.71	1	// COL10A1 // SMPDL3B // MMP11 // MMP12 // ATP10B // MMP9 // THBS2 // S100P // SULF1 // MELK // COL1A1 // COL3A1 // CDH3 // TOP2A // COL11A1
GO:0030554	F	adenyl nucleotide binding	6	72	1620	19133	0.58	1	// TPX2 // ATP10B // MELK // TOP2A // UBE2T // KIF20A
GO:0016787	F	hydrolase activity	10	72	2603	19133	0.52	1	// SMPDL3B // PLPP2 // MMP11 // MMP12 // ATP10B // TMPRSS4 // SULF1 // MMP9 // CDC45 // KIF20A
GO:0005102	F	receptor binding	5	72	1462	19133	0.65	1	// COL3A1 // AGR2 // S100P // SPP1 // CTHRC1
GO:0022891	F	substrate-specific transmembrane transporter activity	6	72	955	19133	0.15	1	// SLC7A5 // SLC2A1 // SERINC2 // CHRNA5 // C15orf48 // SLC50A1
GO:0022857	F	transmembrane transporter activity	7	72	1045	19133	0.099	1	// GJB2 // SLC7A5 // SLC2A1 // SERINC2 // CHRNA5 // C15orf48 // SLC50A1
GO:0001883	F	purine nucleoside binding	6	72	1975	19133	0.77	1	// TPX2 // ATP10B // MELK // TOP2A // UBE2T // KIF20A
GO:0032559	F	adenyl ribonucleotide binding	6	72	1531	19133	0.52	1	// TPX2 // ATP10B // MELK // TOP2A // UBE2T // KIF20A
GO:0001882	F	nucleoside binding	6	72	1982	19133	0.77	1	// TPX2 // ATP10B // MELK // TOP2A // UBE2T // KIF20A
GO:0044421	C	extracellular region part	32	72	3941	19133	4.7e-06	0.0008	// COL10A1 // COL11A1 // MMP12 // SLC7A5 // S100P // NQO1 // COL3A1 // MMP11 // AKR1B10 // GCNT3 // THBS2 // SULF1 // CEACAM5 // LAD1 // CST1 // SPINK1 // MMP9 // DSP // PROM2 // EPCAM // SERINC2 // SMPDL3B // CRABP2 // AGR2 // SLC2A1 // PSAT1 // GPX2 // SPP1 // FUT2 // COL1A1 // CTHRC1 // GOLM1
GO:0005578	C	proteinaceous extracellular matrix	10	72	405	19133	3.2e-06	0.0008	// COL10A1 // COL11A1 // MMP12 // MMP9 // THBS2 // LAD1 // COL1A1 // COL3A1 // CTHRC1 // MMP11
GO:0044420	C	extracellular matrix part	7	72	203	19133	1.4e-05	0.00092	// COL10A1 // COL11A1 // THBS2 // LAD1 // COL1A1 // COL3A1 // CTHRC1
GO:0031012	C	extracellular matrix	11	72	576	19133	1.1e-05	0.00092	// COL10A1 // COL11A1 // MMP12 // MMP9 // THBS2 // DSP // LAD1 // COL1A1 // COL3A1 // CTHRC1 // MMP11
GO:0030496	C	midbody	6	72	133	19133	1.4e-05	0.00092	// ECT2 // ASPM // SLC2A1 // CENPF // PRC1 // KIF20A
GO:0005737	C	cytoplasm	57	72	10816	19133	5e-05	0.0025	// COL10A1 // CLDN10 // COL11A1 // HMGB3 // RPL39L // SLC7A5 // S100P // NQO1 // UBE2T // COL3A1 // PYCR1 // FAM83A // SLC50A1 // MMP11 // OCIAD2 // TPX2 // AKR1B10 // GCNT3 // TYMS // TFAP2A // ASPM // GJB2 // THBS2 // SULF1 // CDCA7 // CRABP2 // CDH3 // SPINK1 // PLEK2 // CENPF // ATP10B // FUT2 // DSP // C15orf48 // PROM2 // IGF2BP3 // KIF20A // PRC1 // CCNB2 // ECT2 // PCP4 // AGR2 // SLC2A1 …
GO:0005581	C	collagen	5	72	102	19133	5.1e-05	0.0025	// COL10A1 // COL3A1 // COL1A1 // COL11A1 // CTHRC1
GO:0005911	C	cell-cell junction	10	72	644	19133	0.00016	0.0061	// CCNB2 // CLDN10 // ECT2 // GJB2 // S100P // DSP // LAD1 // SLC2A1 // EPCAM // CDH3
GO:0005576	C	extracellular region	32	72	4665	19133	0.00016	0.0061	// COL10A1 // COL11A1 // MMP12 // SLC7A5 // S100P // NQO1 // COL3A1 // MMP11 // AKR1B10 // GCNT3 // THBS2 // SULF1 // CEACAM5 // LAD1 // CST1 // SPINK1 // MMP9 // DSP // PROM2 // EPCAM // SERINC2 // SMPDL3B // CRABP2 // AGR2 // SLC2A1 // PSAT1 // GPX2 // SPP1 // FUT2 // COL1A1 // CTHRC1 // GOLM1
GO:0044444	C	cytoplasmic part	45	72	8300	19133	0.00086	0.029	// COL10A1 // COL11A1 // RPL39L // SLC7A5 // NQO1 // COL3A1 // PYCR1 // PRC1 // SLC50A1 // MMP11 // OCIAD2 // TPX2 // AKR1B10 // GCNT3 // TYMS // TFAP2A // GJB2 // THBS2 // SULF1 // CRABP2 // SPINK1 // TOP2A // CENPF // ATP10B // C15orf48 // PROM2 // IGF2BP3 // CCNB2 // ECT2 // PCP4 // AGR2 // SLC2A1 // CDC20 // PSAT1 // MELK // GPX2 // SPP1 // FUT2 // FBXO32 // COL1A1 // CDC45 // KDELR3 // KIAA0…
GO:0070062	C	extracellular vesicular exosome	21	72	2811	19133	0.0013	0.033	// SMPDL3B // MMP9 // AKR1B10 // CRABP2 // GCNT3 // SPP1 // SLC7A5 // S100P // DSP // NQO1 // PSAT1 // GPX2 // LAD1 // PROM2 // GOLM1 // EPCAM // CEACAM5 // SERINC2 // SLC2A1 // SPINK1 // FUT2
GO:0043230	C	extracellular organelle	21	72	2826	19133	0.0013	0.033	// SMPDL3B // MMP9 // AKR1B10 // CRABP2 // GCNT3 // SPP1 // SLC7A5 // S100P // DSP // NQO1 // PSAT1 // GPX2 // LAD1 // PROM2 // GOLM1 // EPCAM // CEACAM5 // SERINC2 // SLC2A1 // SPINK1 // FUT2
GO:0065010	C	extracellular membrane-bounded organelle	21	72	2812	19133	0.0013	0.033	// SMPDL3B // MMP9 // AKR1B10 // CRABP2 // GCNT3 // SPP1 // SLC7A5 // S100P // DSP // NQO1 // PSAT1 // GPX2 // LAD1 // PROM2 // GOLM1 // EPCAM // CEACAM5 // SERINC2 // SLC2A1 // SPINK1 // FUT2
GO:0031988	C	membrane-bounded vesicle	25	72	3619	19133	0.0012	0.033	// SLC7A5 // S100P // NQO1 // AKR1B10 // CRABP2 // THBS2 // LAD1 // CEACAM5 // SPINK1 // ATP10B // MMP9 // DSP // PROM2 // EPCAM // SERINC2 // SMPDL3B // GCNT3 // SLC2A1 // PSAT1 // GPX2 // SPP1 // FUT2 // COL1A1 // KDELR3 // GOLM1
GO:0031982	C	vesicle	25	72	3754	19133	0.002	0.044	// SLC7A5 // S100P // NQO1 // AKR1B10 // CRABP2 // THBS2 // LAD1 // CEACAM5 // SPINK1 // ATP10B // MMP9 // DSP // PROM2 // EPCAM // SERINC2 // SMPDL3B // GCNT3 // SLC2A1 // PSAT1 // GPX2 // SPP1 // FUT2 // COL1A1 // KDELR3 // GOLM1
GO:0043227	C	membrane-bounded organelle	57	72	12284	19133	0.0045	0.096	// COL10A1 // COL11A1 // HMGB3 // SLC7A5 // S100P // NQO1 // COL3A1 // PYCR1 // PRC1 // SLC50A1 // MMP11 // OCIAD2 // TPX2 // AKR1B10 // GCNT3 // TYMS // TFAP2A // ASPM // THBS2 // SULF1 // LAD1 // CDCA7 // CRABP2 // CEACAM5 // SPINK1 // TOP2A // CENPF // ATP10B // MMP9 // DSP // AIM2 // C15orf48 // PROM2 // EPCAM // IGF2BP3 // SERINC2 // ETV4 // SMPDL3B // CCNB2 // ECT2 // PCP4 // AGR2 // SLC2A1…
GO:0005819	C	spindle	5	72	303	19133	0.006	0.12	// CENPF // TPX2 // KIF20A // PRC1 // CDC20
GO:0005913	C	cell-cell adherens junction	5	72	332	19133	0.0087	0.16	// CCNB2 // CDH3 // LAD1 // S100P // DSP
GO:0043226	C	organelle	59	72	13188	19133	0.0096	0.17	// COL10A1 // COL11A1 // HMGB3 // RPL39L // SLC7A5 // S100P // NQO1 // COL3A1 // PYCR1 // PRC1 // SLC50A1 // MMP11 // OCIAD2 // TPX2 // AKR1B10 // GCNT3 // TYMS // TFAP2A // ASPM // THBS2 // SULF1 // LAD1 // CDCA7 // CRABP2 // CEACAM5 // SPINK1 // PLEK2 // CENPF // ATP10B // MMP9 // DSP // AIM2 // C15orf48 // PROM2 // EPCAM // IGF2BP3 // SERINC2 // KIF20A // ETV4 // SMPDL3B // CCNB2 // ECT2 // PC…
GO:0005813	C	centrosome	6	72	496	19133	0.011	0.19	// CCNB2 // TFAP2A // CENPF // CDC20 // CDC45 // TOP2A
GO:0030054	C	cell junction	11	72	1379	19133	0.014	0.23	// CCNB2 // CLDN10 // ECT2 // GJB2 // S100P // DSP // CHRNA5 // LAD1 // SLC2A1 // EPCAM // CDH3
GO:0005615	C	extracellular space	11	72	1444	19133	0.019	0.29	// SMPDL3B // MMP9 // AGR2 // SULF1 // SPP1 // GOLM1 // COL1A1 // COL3A1 // CST1 // CTHRC1 // SPINK1
GO:0015630	C	microtubule cytoskeleton	9	72	1100	19133	0.022	0.33	// CCNB2 // TPX2 // TFAP2A // CENPF // CDC20 // CDC45 // PRC1 // KIF20A // TOP2A
GO:0005794	C	Golgi apparatus	11	72	1489	19133	0.023	0.33	// MMP11 // GCNT3 // TFAP2A // SULF1 // SLC2A1 // GOLM1 // COL1A1 // KDELR3 // KIF20A // SLC50A1 // FUT2
GO:0005815	C	microtubule organizing center	6	72	647	19133	0.036	0.48	// CCNB2 // TFAP2A // CENPF // CDC20 // CDC45 // TOP2A
GO:0044424	C	intracellular part	59	72	13919	19133	0.049	0.63	// COL10A1 // CLDN10 // COL11A1 // HMGB3 // RPL39L // SLC7A5 // S100P // NQO1 // UBE2T // COL3A1 // PYCR1 // FAM83A // SLC50A1 // MMP11 // OCIAD2 // TPX2 // AKR1B10 // GCNT3 // TYMS // TFAP2A // ASPM // GJB2 // THBS2 // SULF1 // CDCA7 // CRABP2 // CDH3 // SPINK1 // PLEK2 // CENPF // ATP10B // FUT2 // DSP // AIM2 // C15orf48 // PROM2 // IGF2BP3 // KIF20A // PRC1 // ETV4 // CCNB2 // ECT2 // PCP4 //…
GO:0044430	C	cytoskeletal part	11	72	1690	19133	0.051	0.64	// CCNB2 // TPX2 // TFAP2A // CENPF // DSP // CDC20 // SLC2A1 // CDC45 // PRC1 // KIF20A // TOP2A
GO:0044431	C	Golgi apparatus part	7	72	926	19133	0.06	0.72	// MMP11 // GCNT3 // SULF1 // FUT2 // KDELR3 // SLC2A1 // SLC50A1
GO:0016323	C	basolateral plasma membrane	5	72	582	19133	0.069	0.81	// SLC2A1 // EPCAM // CEACAM5 // PROM2 // DSP
GO:0044459	C	plasma membrane part	18	72	3386	19133	0.076	0.85	// CCNB2 // CLDN10 // GJB2 // ECT2 // SLC7A5 // S100P // DSP // CHRNA5 // TNFRSF21 // PLPP2 // LAD1 // PROM2 // GOLM1 // EPCAM // CEACAM5 // CDH3 // SLC2A1 // PLEK2
GO:0070013	C	intracellular organelle lumen	22	72	4427	19133	0.091	1	// COL10A1 // COL11A1 // COL3A1 // KIAA0101 // PYCR1 // MMP11 // TPX2 // CRABP2 // TFAP2A // CDCA7 // TOP2A // CENPF // PRC1 // CCNB2 // ETV4 // CDC20 // TYMS // FBXO32 // COL1A1 // CDC45 // UBE2T // KIF20A
GO:0044464	C	cell part	69	72	17391	19133	0.098	1	// COL10A1 // CLDN10 // COL11A1 // HMGB3 // RPL39L // SLC7A5 // S100P // NQO1 // UBE2T // COL3A1 // PYCR1 // FAM83A // SLC50A1 // MMP11 // OCIAD2 // TPX2 // AKR1B10 // LGSN // GCNT3 // TYMS // TFAP2A // ASPM // GJB2 // THBS2 // SULF1 // LAD1 // CDCA7 // CRABP2 // CEACAM5 // CDH3 // SPINK1 // PLEK2 // PLPP2 // CENPF // ATP10B // FUT2 // TMPRSS4 // DSP // AIM2 // CHRNA5 // TNFRSF21 // C15orf48 // P…
GO:0005622	C	intracellular	59	72	14274	19133	0.095	1	// COL10A1 // CLDN10 // COL11A1 // HMGB3 // RPL39L // SLC7A5 // S100P // NQO1 // UBE2T // COL3A1 // PYCR1 // FAM83A // SLC50A1 // MMP11 // OCIAD2 // TPX2 // AKR1B10 // GCNT3 // TYMS // TFAP2A // ASPM // GJB2 // THBS2 // SULF1 // CDCA7 // CRABP2 // CDH3 // SPINK1 // PLEK2 // CENPF // ATP10B // FUT2 // DSP // AIM2 // C15orf48 // PROM2 // IGF2BP3 // KIF20A // PRC1 // ETV4 // CCNB2 // ECT2 // PCP4 //…
GO:0044428	C	nuclear part	16	72	4072	19133	0.47	1	// CCNB2 // TPX2 // ETV4 // CRABP2 // TFAP2A // CENPF // CDC20 // TYMS // UBE2T // CDCA7 // FBXO32 // CDC45 // PRC1 // KIF20A // KIAA0101 // TOP2A
GO:0044425	C	membrane part	30	72	7679	19133	0.44	1	// CLDN10 // SLC7A5 // S100P // NQO1 // SLC50A1 // ECT2 // GJB2 // SULF1 // LAD1 // CEACAM5 // CDH3 // PLEK2 // PLPP2 // ATP10B // TMPRSS4 // DSP // CHRNA5 // TNFRSF21 // C15orf48 // PROM2 // EPCAM // SERINC2 // SMPDL3B // CCNB2 // GCNT3 // SLC2A1 // FUT2 // COL1A1 // KDELR3 // GOLM1
GO:0044422	C	organelle part	34	72	8593	19133	0.39	1	// COL10A1 // COL11A1 // COL3A1 // PYCR1 // PRC1 // SLC50A1 // MMP11 // OCIAD2 // TPX2 // GCNT3 // TFAP2A // SULF1 // CDCA7 // CRABP2 // TOP2A // CENPF // ATP10B // DSP // C15orf48 // PROM2 // CCNB2 // ETV4 // RPL39L // SLC2A1 // CDC20 // TYMS // FUT2 // FBXO32 // COL1A1 // CDC45 // KDELR3 // KIAA0101 // UBE2T // KIF20A
GO:0005654	C	nucleoplasm	16	72	3112	19133	0.12	1	// CCNB2 // TPX2 // ETV4 // CRABP2 // TFAP2A // CENPF // CDC20 // TYMS // UBE2T // CDCA7 // FBXO32 // CDC45 // PRC1 // KIF20A // KIAA0101 // TOP2A
GO:0070161	C	anchoring junction	5	72	711	19133	0.13	1	// CCNB2 // CDH3 // LAD1 // S100P // DSP
GO:0031226	C	intrinsic to plasma membrane	9	72	1701	19133	0.19	1	// PLPP2 // SLC7A5 // SLC2A1 // CHRNA5 // TNFRSF21 // CEACAM5 // PROM2 // EPCAM // GOLM1
GO:0031224	C	intrinsic to membrane	23	72	6052	19133	0.52	1	// CLDN10 // SLC7A5 // NQO1 // SLC50A1 // GCNT3 // GJB2 // CEACAM5 // CDH3 // PLPP2 // ATP10B // TMPRSS4 // CHRNA5 // TNFRSF21 // C15orf48 // PROM2 // EPCAM // SERINC2 // SMPDL3B // SLC2A1 // FUT2 // COL1A1 // KDELR3 // GOLM1
GO:0044463	C	cell projection part	5	72	961	19133	0.3	1	// CENPF // TPX2 // S100P // PROM2 // PLEK2
GO:0016023	C	cytoplasmic membrane-bounded vesicle	6	72	1183	19133	0.29	1	// ATP10B // THBS2 // SLC2A1 // COL1A1 // KDELR3 // SPINK1
GO:0016021	C	integral to membrane	22	72	5943	19133	0.58	1	// CLDN10 // SLC7A5 // NQO1 // SLC50A1 // GCNT3 // GJB2 // CEACAM5 // CDH3 // PLPP2 // ATP10B // TMPRSS4 // CHRNA5 // TNFRSF21 // C15orf48 // PROM2 // EPCAM // SERINC2 // SLC2A1 // FUT2 // COL1A1 // KDELR3 // GOLM1
GO:0016020	C	membrane	35	72	9730	19133	0.69	1	// CLDN10 // SLC7A5 // S100P // NQO1 // PRC1 // SLC50A1 // OCIAD2 // LGSN // ECT2 // TYMS // GJB2 // SULF1 // LAD1 // CEACAM5 // CDH3 // PLEK2 // PLPP2 // ATP10B // TMPRSS4 // DSP // CHRNA5 // TNFRSF21 // C15orf48 // PROM2 // EPCAM // SERINC2 // SMPDL3B // CCNB2 // GCNT3 // SLC2A1 // MELK // FUT2 // COL1A1 // KDELR3 // GOLM1
GO:0043234	C	protein complex	12	72	4586	19133	0.95	1	// TPX2 // CENPF // GJB2 // DSP // CDC20 // CHRNA5 // C15orf48 // FBXO32 // CDC45 // PRC1 // KIF20A // TOP2A
GO:0043231	C	intracellular membrane-bounded organelle	46	72	11122	19133	0.19	1	// COL10A1 // COL11A1 // HMGB3 // SLC7A5 // S100P // COL3A1 // PYCR1 // PRC1 // SLC50A1 // MMP11 // OCIAD2 // TPX2 // AKR1B10 // GCNT3 // TYMS // TFAP2A // ASPM // THBS2 // SULF1 // CDCA7 // CRABP2 // SPINK1 // TOP2A // CENPF // ATP10B // DSP // AIM2 // C15orf48 // GOLM1 // IGF2BP3 // ETV4 // CCNB2 // ECT2 // PCP4 // AGR2 // SLC2A1 // CDC20 // MELK // FUT2 // FBXO32 // COL1A1 // CDC45 // KDELR3 /…
GO:0043232	C	intracellular non-membrane-bounded organelle	16	72	4092	19133	0.48	1	// CCNB2 // TPX2 // KIF20A // ETV4 // TYMS // HMGB3 // CENPF // RPL39L // DSP // CDC20 // TFAP2A // SLC2A1 // CDC45 // PRC1 // TOP2A // PLEK2
GO:0043233	C	organelle lumen	22	72	4499	19133	0.1	1	// COL10A1 // COL11A1 // COL3A1 // KIAA0101 // PYCR1 // MMP11 // TPX2 // CRABP2 // TFAP2A // CDCA7 // TOP2A // CENPF // PRC1 // CCNB2 // ETV4 // CDC20 // TYMS // FBXO32 // COL1A1 // CDC45 // UBE2T // KIF20A
GO:0005829	C	cytosol	17	72	3409	19133	0.13	1	// CCNB2 // TPX2 // AKR1B10 // CRABP2 // ECT2 // CENPF // SLC7A5 // RPL39L // SLC2A1 // NQO1 // PSAT1 // TYMS // GPX2 // IGF2BP3 // CDC20 // PRC1 // PCP4
GO:0044432	C	endoplasmic reticulum part	6	72	1181	19133	0.29	1	// COL10A1 // COL11A1 // ATP10B // COL1A1 // KDELR3 // COL3A1
GO:0031090	C	organelle membrane	9	72	3177	19133	0.87	1	// OCIAD2 // GCNT3 // ATP10B // SLC2A1 // TYMS // C15orf48 // FUT2 // KDELR3 // SLC50A1
GO:0043228	C	non-membrane-bounded organelle	16	72	4092	19133	0.48	1	// CCNB2 // TPX2 // KIF20A // ETV4 // TYMS // HMGB3 // CENPF // RPL39L // DSP // CDC20 // TFAP2A // SLC2A1 // CDC45 // PRC1 // TOP2A // PLEK2
GO:0005783	C	endoplasmic reticulum	9	72	1661	19133	0.17	1	// COL10A1 // COL11A1 // CRABP2 // KDELR3 // ATP10B // AGR2 // SULF1 // COL1A1 // COL3A1
GO:0031974	C	membrane-enclosed lumen	22	72	4555	19133	0.12	1	// COL10A1 // COL11A1 // COL3A1 // KIAA0101 // PYCR1 // MMP11 // TPX2 // CRABP2 // TFAP2A // CDCA7 // TOP2A // CENPF // PRC1 // CCNB2 // ETV4 // CDC20 // TYMS // FBXO32 // COL1A1 // CDC45 // UBE2T // KIF20A
GO:0043229	C	intracellular organelle	49	72	12235	19133	0.28	1	// COL10A1 // COL11A1 // HMGB3 // RPL39L // SLC7A5 // S100P // COL3A1 // PYCR1 // PRC1 // SLC50A1 // MMP11 // OCIAD2 // TPX2 // AKR1B10 // GCNT3 // TYMS // TFAP2A // ASPM // THBS2 // SULF1 // CDCA7 // CRABP2 // SPINK1 // PLEK2 // CENPF // ATP10B // DSP // AIM2 // C15orf48 // PROM2 // IGF2BP3 // KIF20A // ETV4 // CCNB2 // ECT2 // PCP4 // AGR2 // SLC2A1 // CDC20 // MELK // FUT2 // FBXO32 // COL1A1 …
GO:0005856	C	cytoskeleton	12	72	2216	19133	0.13	1	// CCNB2 // TPX2 // KIF20A // TFAP2A // CENPF // DSP // CDC20 // SLC2A1 // CDC45 // PRC1 // TOP2A // PLEK2
GO:0071212	C	subsynaptic reticulum	6	72	1232	19133	0.32	1	// COL10A1 // COL11A1 // ATP10B // COL1A1 // KDELR3 // COL3A1
GO:0012505	C	endomembrane system	7	72	3963	19133	1	1	// GCNT3 // CENPF // ATP10B // SLC2A1 // FUT2 // KDELR3 // SLC50A1
GO:0044446	C	intracellular organelle part	34	72	8504	19133	0.36	1	// COL10A1 // COL11A1 // COL3A1 // PYCR1 // PRC1 // SLC50A1 // MMP11 // OCIAD2 // TPX2 // GCNT3 // TFAP2A // SULF1 // CDCA7 // CRABP2 // TOP2A // CENPF // ATP10B // DSP // C15orf48 // PROM2 // CCNB2 // ETV4 // RPL39L // SLC2A1 // CDC20 // TYMS // FUT2 // FBXO32 // COL1A1 // CDC45 // KDELR3 // KIAA0101 // UBE2T // KIF20A
GO:0005634	C	nucleus	28	72	7055	19133	0.4	1	// HMGB3 // S100P // PRC1 // KIAA0101 // SLC50A1 // TPX2 // ECT2 // TYMS // TFAP2A // ASPM // CDCA7 // CRABP2 // TOP2A // CENPF // DSP // AIM2 // C15orf48 // IGF2BP3 // CCNB2 // ETV4 // PCP4 // SLC2A1 // CDC20 // MELK // FBXO32 // CDC45 // UBE2T // KIF20A
GO:0005739	C	mitochondrion	5	72	1703	19133	0.78	1	// OCIAD2 // C15orf48 // PYCR1 // AGR2 // TYMS
GO:0042995	C	cell projection	7	72	1876	19133	0.57	1	// TPX2 // CENPF // S100P // TNFRSF21 // SPP1 // PROM2 // PLEK2
GO:0031981	C	nuclear lumen	16	72	3691	19133	0.31	1	// CCNB2 // TPX2 // ETV4 // CRABP2 // TFAP2A // CENPF // CDC20 // TYMS // UBE2T // CDCA7 // FBXO32 // CDC45 // PRC1 // KIF20A // KIAA0101 // TOP2A
GO:0000139	C	Golgi membrane	5	72	718	19133	0.13	1	// KDELR3 // SLC2A1 // GCNT3 // SLC50A1 // FUT2
GO:0031410	C	cytoplasmic vesicle	7	72	1284	19133	0.21	1	// ATP10B // THBS2 // SLC2A1 // PROM2 // COL1A1 // KDELR3 // SPINK1
GO:0005623	C	cell	69	72	17414	19133	0.1	1	// COL10A1 // CLDN10 // COL11A1 // HMGB3 // RPL39L // SLC7A5 // S100P // NQO1 // UBE2T // COL3A1 // PYCR1 // FAM83A // SLC50A1 // MMP11 // OCIAD2 // TPX2 // AKR1B10 // LGSN // GCNT3 // TYMS // TFAP2A // ASPM // GJB2 // THBS2 // SULF1 // LAD1 // CDCA7 // CRABP2 // CEACAM5 // CDH3 // SPINK1 // PLEK2 // PLPP2 // CENPF // ATP10B // FUT2 // TMPRSS4 // DSP // AIM2 // CHRNA5 // TNFRSF21 // C15orf48 // P…
GO:0005887	C	integral to plasma membrane	9	72	1635	19133	0.16	1	// PLPP2 // SLC7A5 // SLC2A1 // CHRNA5 // TNFRSF21 // CEACAM5 // PROM2 // EPCAM // GOLM1
GO:0005886	C	plasma membrane	25	72	5601	19133	0.19	1	// CLDN10 // SLC7A5 // S100P // PRC1 // SLC50A1 // LGSN // ECT2 // GJB2 // SULF1 // LAD1 // CEACAM5 // CDH3 // PLEK2 // PLPP2 // ATP10B // DSP // CHRNA5 // TNFRSF21 // PROM2 // EPCAM // SMPDL3B // CCNB2 // SLC2A1 // MELK // GOLM1
GO:0032991	C	macromolecular complex	13	72	5320	19133	0.98	1	// TPX2 // CENPF // GJB2 // RPL39L // DSP // CDC20 // CHRNA5 // C15orf48 // FBXO32 // CDC45 // PRC1 // KIF20A // TOP2A
GO:0005912	C	adherens junction	5	72	694	19133	0.12	1	// CCNB2 // CDH3 // LAD1 // S100P // DSP

## Sheet: Downregulated
GO term	Ontology	Description	Number in input list	Number in BG/Ref	p-value	FDR
GO:0001944	P	vasculature development	38	622	2.1e-14	1.5e-10
GO:0001568	P	blood vessel development	36	601	1.9e-13	6.7e-10
GO:0001525	P	angiogenesis	27	425	7.3e-11	1.2e-07
GO:0048514	P	blood vessel morphogenesis	30	521	5.9e-11	1.2e-07
GO:0048513	P	organ development	92	3614	2e-10	2.7e-07
GO:0009653	P	anatomical structure morphogenesis	77	2847	8.6e-10	9.8e-07
GO:0051239	P	regulation of multicellular organismal process	76	2824	1.4e-09	1.4e-06
GO:0048731	P	system development	105	4582	2.1e-09	1.8e-06
GO:0051384	P	response to glucocorticoid stimulus	15	143	3.1e-09	2.1e-06
GO:0032502	P	developmental process	126	5987	3.1e-09	2.1e-06
GO:0032501	P	multicellular organismal process	146	7398	3.9e-09	2.4e-06
GO:0009611	P	response to wounding	45	1300	7.5e-09	4.3e-06
GO:0008285	P	negative regulation of cell proliferation	30	651	8.7e-09	4.6e-06
GO:0031960	P	response to corticosteroid stimulus	15	158	1.1e-08	5.2e-06
GO:0048545	P	response to steroid hormone stimulus	26	507	1.2e-08	5.4e-06
GO:0016477	P	cell migration	43	1230	1.3e-08	5.5e-06
GO:0007275	P	multicellular organismal development	110	5093	2e-08	8e-06
GO:0042127	P	regulation of cell proliferation	48	1552	6.7e-08	2.5e-05
GO:0043542	P	endothelial cell migration	14	158	7.4e-08	2.7e-05
GO:0040011	P	locomotion	49	1624	9.9e-08	3.4e-05
GO:0050727	P	regulation of inflammatory response	19	314	1.1e-07	3.6e-05
GO:0010594	P	regulation of endothelial cell migration	12	115	1.3e-07	3.6e-05
GO:0051674	P	localization of cell	43	1336	1.3e-07	3.6e-05
GO:0048870	P	cell motility	43	1336	1.3e-07	3.6e-05
GO:0050793	P	regulation of developmental process	63	2402	1.5e-07	4.2e-05
GO:0040012	P	regulation of locomotion	31	792	1.7e-07	4.5e-05
GO:0051270	P	regulation of cellular component movement	31	802	2.2e-07	5.6e-05
GO:0030334	P	regulation of cell migration	28	685	3.1e-07	7.4e-05
GO:0043627	P	response to estrogen stimulus	14	186	4.8e-07	0.00011
GO:0030154	P	cell differentiation	84	3726	4.7e-07	0.00011
GO:0008283	P	cell proliferation	54	1989	5.4e-07	0.00012
GO:0048856	P	anatomical structure development	113	5611	5.5e-07	0.00012
GO:0045765	P	regulation of angiogenesis	15	222	6.8e-07	0.00014
GO:0006954	P	inflammatory response	29	761	7.4e-07	0.00015
GO:0048519	P	negative regulation of biological process	98	4663	8.2e-07	0.00016
GO:0006897	P	endocytosis	27	683	9.4e-07	0.00018
GO:0009725	P	response to hormone stimulus	33	953	9.6e-07	0.00018
GO:0002040	P	sprouting angiogenesis	9	70	1e-06	0.00018
GO:0010324	P	membrane invagination	27	690	1.1e-06	0.0002
GO:0001822	P	kidney development	16	267	1.3e-06	0.00022
GO:0050900	P	leukocyte migration	19	377	1.5e-06	0.00026
GO:0006928	P	cellular component movement	49	1801	1.9e-06	0.00031
GO:0010596	P	negative regulation of endothelial cell migration	7	39	2.3e-06	0.00035
GO:0030336	P	negative regulation of cell migration	14	214	2.3e-06	0.00035
GO:0072001	P	renal system development	16	283	2.6e-06	0.0004
GO:0007155	P	cell adhesion	47	1729	3.3e-06	0.00049
GO:0006952	P	defense response	44	1568	3.3e-06	0.00049
GO:0022610	P	biological adhesion	47	1735	3.7e-06	0.00052
GO:0002376	P	immune system process	60	2470	4e-06	0.00056
GO:0051271	P	negative regulation of cellular component movement	15	259	4.1e-06	0.00056
GO:0032101	P	regulation of response to external stimulus	29	834	4.3e-06	0.00057
GO:0006898	P	receptor-mediated endocytosis	17	337	5.4e-06	0.00072
GO:0048660	P	regulation of smooth muscle cell proliferation	10	113	5.7e-06	0.00073
GO:0003008	P	system process	60	2510	6.6e-06	0.00082
GO:0048518	P	positive regulation of biological process	105	5343	6.5e-06	0.00082
GO:0048659	P	smooth muscle cell proliferation	10	116	7e-06	0.00086
GO:0045926	P	negative regulation of growth	14	240	8e-06	0.00096
GO:0048869	P	cellular developmental process	87	4195	8.8e-06	0.001
GO:0010038	P	response to metal ion	16	313	8.8e-06	0.001
GO:0001655	P	urogenital system development	16	320	1.1e-05	0.0013
GO:0070372	P	regulation of ERK1 and ERK2 cascade	14	249	1.2e-05	0.0013
GO:0003013	P	circulatory system process	21	521	1.2e-05	0.0013
GO:0040013	P	negative regulation of locomotion	14	258	1.7e-05	0.0019
GO:0009887	P	organ morphogenesis	35	1203	1.8e-05	0.0019
GO:0040008	P	regulation of growth	24	669	1.8e-05	0.0019
GO:0009605	P	response to external stimulus	64	2840	1.9e-05	0.0019
GO:0030198	P	extracellular matrix organization	16	334	1.9e-05	0.0019
GO:0048646	P	anatomical structure formation involved in morphogenesis	35	1206	1.9e-05	0.0019
GO:0031347	P	regulation of defense response	24	676	2.2e-05	0.0021
GO:0070371	P	ERK1 and ERK2 cascade	14	264	2.2e-05	0.0021
GO:0033002	P	muscle cell proliferation	11	164	2.3e-05	0.0022
GO:0031589	P	cell-substrate adhesion	15	309	3e-05	0.0028
GO:0010035	P	response to inorganic substance	21	559	3.3e-05	0.0031
GO:0048523	P	negative regulation of cellular process	87	4342	3.4e-05	0.0031
GO:0008015	P	blood circulation	20	517	3.4e-05	0.0031
GO:0042221	P	response to chemical stimulus	85	4218	3.5e-05	0.0031
GO:0040007	P	growth	30	987	3.5e-05	0.0031
GO:0045444	P	fat cell differentiation	12	208	3.9e-05	0.0034
GO:0090066	P	regulation of anatomical structure size	27	859	5.2e-05	0.0044
GO:0065008	P	regulation of biological quality	79	3874	5.2e-05	0.0044
GO:0032355	P	response to estradiol stimulus	9	121	6e-05	0.005
GO:0022603	P	regulation of anatomical structure morphogenesis	31	1077	7e-05	0.0058
GO:0009617	P	response to bacterium	20	546	7.1e-05	0.0059
GO:0009888	P	tissue development	45	1852	8.4e-05	0.0067
GO:0006950	P	response to stress	78	3867	8.6e-05	0.0067
GO:0045766	P	positive regulation of angiogenesis	9	127	8.5e-05	0.0067
GO:0051094	P	positive regulation of developmental process	33	1193	8.5e-05	0.0067
GO:0016049	P	cell growth	19	509	8.5e-05	0.0067
GO:0032496	P	response to lipopolysaccharide	14	302	8.8e-05	0.0068
GO:0003018	P	vascular process in circulatory system	10	160	9.3e-05	0.007
GO:0051179	P	localization	109	5945	9.2e-05	0.007
GO:0007507	P	heart development	19	513	9.4e-05	0.007
GO:0001936	P	regulation of endothelial cell proliferation	8	100	9.6e-05	0.007
GO:0016192	P	vesicle-mediated transport	40	1584	0.0001	0.0072
GO:0016525	P	negative regulation of angiogenesis	7	75	0.00011	0.0078
GO:0044236	P	multicellular organismal metabolic process	9	133	0.00012	0.0084
GO:0002673	P	regulation of acute inflammatory response	7	77	0.00013	0.0089
GO:0070542	P	response to fatty acid	6	53	0.00013	0.0089
GO:0002576	P	platelet degranulation	8	107	0.00015	0.01
GO:0045428	P	regulation of nitric oxide biosynthetic process	6	55	0.00015	0.011
GO:0002237	P	response to molecule of bacterial origin	14	320	0.00016	0.011
GO:0045124	P	regulation of bone resorption	5	34	0.00016	0.011
GO:0032879	P	regulation of localization	55	2502	0.00017	0.011
GO:0000165	P	MAPKKK cascade	26	875	0.00017	0.011
GO:0003012	P	muscle system process	16	406	0.00017	0.011
GO:0065007	P	biological regulation	184	11612	0.00019	0.012
GO:0044057	P	regulation of system process	23	735	0.0002	0.013
GO:0010033	P	response to organic substance	60	2840	0.00023	0.014
GO:0031623	P	receptor internalization	7	86	0.00024	0.015
GO:0046903	P	secretion	31	1158	0.00025	0.015
GO:0006936	P	muscle contraction	14	336	0.00026	0.016
GO:0043062	P	extracellular structure organization	19	557	0.00026	0.016
GO:0061061	P	muscle structure development	21	652	0.00026	0.016
GO:0042493	P	response to drug	16	425	0.00028	0.017
GO:0001935	P	endothelial cell proliferation	8	119	0.00029	0.017
GO:0045595	P	regulation of cell differentiation	39	1616	0.0003	0.018
GO:0008361	P	regulation of cell size	19	569	0.00034	0.02
GO:0019915	P	lipid storage	6	65	0.00036	0.021
GO:0010883	P	regulation of lipid storage	5	42	0.00038	0.022
GO:0006809	P	nitric oxide biosynthetic process	6	66	0.00038	0.022
GO:0003007	P	heart morphogenesis	11	230	0.00039	0.022
GO:0030029	P	actin filament-based process	21	672	0.00039	0.022
GO:0007517	P	muscle organ development	18	532	0.00041	0.023
GO:0046850	P	regulation of bone remodeling	5	43	0.00042	0.023
GO:0070482	P	response to oxygen levels	13	314	0.00045	0.024
GO:0009409	P	response to cold	5	44	0.00047	0.025
GO:0051707	P	response to other organism	24	833	0.00047	0.025
GO:0000904	P	cell morphogenesis involved in differentiation	23	783	0.00048	0.026
GO:0051591	P	response to cAMP	7	98	0.0005	0.026
GO:0032940	P	secretion by cell	27	993	0.0005	0.026
GO:0046209	P	nitric oxide metabolic process	6	70	0.00051	0.027
GO:0044246	P	regulation of multicellular organismal metabolic process	5	46	0.00056	0.029
GO:0032535	P	regulation of cellular component size	22	745	0.00059	0.03
GO:0043086	P	negative regulation of catalytic activity	25	900	0.0006	0.03
GO:0007243	P	protein kinase cascade	33	1333	0.0006	0.03
GO:0007167	P	enzyme linked receptor protein signaling pathway	27	1008	0.00063	0.031
GO:0001666	P	response to hypoxia	12	286	0.00066	0.033
GO:0043534	P	blood vessel endothelial cell migration	6	74	0.00068	0.033
GO:0048661	P	positive regulation of smooth muscle cell proliferation	6	74	0.00068	0.033
GO:0030308	P	negative regulation of cell growth	9	171	0.00069	0.033
GO:0006959	P	humoral immune response	11	250	0.00076	0.037
GO:0010627	P	regulation of protein kinase cascade	28	1091	0.00094	0.044
GO:0043535	P	regulation of blood vessel endothelial cell migration	5	52	0.00094	0.044
GO:0010810	P	regulation of cell-substrate adhesion	9	179	0.00093	0.044
GO:0010646	P	regulation of cell communication	62	3127	0.00093	0.044
GO:0050728	P	negative regulation of inflammatory response	7	110	0.00095	0.045
GO:0045792	P	negative regulation of cell size	9	180	0.00097	0.045
GO:0030036	P	actin cytoskeleton organization	18	575	0.00099	0.046
GO:0045600	P	positive regulation of fat cell differentiation	5	53	0.001	0.046
GO:0042130	P	negative regulation of T cell proliferation	5	53	0.001	0.046
GO:0048771	P	tissue remodeling	8	146	0.0011	0.048
GO:0045453	P	bone resorption	5	54	0.0011	0.049
GO:0030246	F	carbohydrate binding	27	471	6.3e-10	3.7e-07
GO:0030247	F	polysaccharide binding	16	237	2.9e-07	5.6e-05
GO:0001871	F	pattern binding	16	237	2.9e-07	5.6e-05
GO:0005539	F	glycosaminoglycan binding	13	209	8.8e-06	0.0013
GO:0030169	F	low-density lipoprotein binding	5	24	3.6e-05	0.0042
GO:0005509	F	calcium ion binding	24	717	5.4e-05	0.0052
GO:0008201	F	heparin binding	10	160	9.3e-05	0.0077
GO:0008034	F	lipoprotein binding	5	32	0.00012	0.0088
GO:0019838	F	growth factor binding	9	139	0.00016	0.01
GO:0005044	F	scavenger receptor activity	5	48	0.00067	0.033
GO:0019955	F	cytokine binding	9	169	0.00063	0.033
GO:0001948	F	glycoprotein binding	7	103	0.00066	0.033
GO:0050840	F	extracellular matrix binding	5	53	0.001	0.043
GO:0004857	F	enzyme inhibitor activity	14	389	0.001	0.043
GO:0044421	C	extracellular region part	107	3941	2.8e-14	2.1e-11
GO:0005576	C	extracellular region	118	4665	7.7e-14	2.8e-11
GO:0031012	C	extracellular matrix	34	576	1.4e-12	3.5e-10
GO:0005578	C	proteinaceous extracellular matrix	28	405	4.9e-12	9e-10
GO:0044459	C	plasma membrane part	85	3386	2.8e-09	4.2e-07
GO:0005615	C	extracellular space	48	1444	7.6e-09	7.2e-07
GO:0031988	C	membrane-bounded vesicle	88	3619	6.1e-09	7.2e-07
GO:0005886	C	plasma membrane	119	5601	7.8e-09	7.2e-07
GO:0031982	C	vesicle	89	3754	1.6e-08	1.3e-06
GO:0045121	C	membrane raft	19	277	1.7e-08	1.3e-06
GO:0009986	C	cell surface	31	765	8.1e-08	5.5e-06
GO:0070062	C	extracellular vesicular exosome	69	2811	3.9e-07	2.2e-05
GO:0065010	C	extracellular membrane-bounded organelle	69	2812	3.9e-07	2.2e-05
GO:0043230	C	extracellular organelle	69	2826	4.7e-07	2.5e-05
GO:0031224	C	intrinsic to membrane	119	6052	7.6e-07	3.7e-05
GO:0044425	C	membrane part	142	7679	8.4e-07	3.9e-05
GO:0016020	C	membrane	169	9730	1.1e-06	5e-05
GO:0044420	C	extracellular matrix part	14	203	1.3e-06	5.2e-05
GO:0009897	C	external side of plasma membrane	15	246	2.3e-06	8.8e-05
GO:0030141	C	secretory granule	18	358	3e-06	0.00011
GO:0016021	C	integral to membrane	114	5943	6e-06	0.00021
GO:0044449	C	contractile fiber part	13	205	7.3e-06	0.00024
GO:0031226	C	intrinsic to plasma membrane	45	1701	1.1e-05	0.00036
GO:0043292	C	contractile fiber	13	224	1.8e-05	0.00055
GO:0005887	C	integral to plasma membrane	42	1635	4.5e-05	0.0013
GO:0016023	C	cytoplasmic membrane-bounded vesicle	33	1183	7.2e-05	0.002
GO:0030666	C	endocytic vesicle membrane	10	155	7.3e-05	0.002
GO:0030139	C	endocytic vesicle	13	259	7.4e-05	0.002
GO:0005581	C	collagen	8	102	0.00011	0.0027
GO:0031091	C	platelet alpha granule	7	75	0.00011	0.0027
GO:0031410	C	cytoplasmic vesicle	34	1284	0.00015	0.0035
GO:0032432	C	actin filament bundle	6	61	0.00026	0.006
GO:0044433	C	cytoplasmic vesicle part	20	615	0.00033	0.0073
GO:0016323	C	basolateral plasma membrane	19	582	0.00044	0.0096
GO:0005912	C	adherens junction	21	694	0.00058	0.012
GO:0005901	C	caveola	6	73	0.00063	0.013
GO:0070161	C	anchoring junction	21	711	0.00079	0.015
GO:0030016	C	myofibril	10	212	0.00079	0.015
GO:0015629	C	actin cytoskeleton	16	467	0.00076	0.015
GO:0001725	C	stress fiber	5	54	0.0011	0.02
GO:0030667	C	secretory granule membrane	6	84	0.0013	0.023
GO:0030017	C	sarcomere	9	188	0.0013	0.023
GO:0030136	C	clathrin-coated vesicle	11	269	0.0013	0.023
GO:0044444	C	cytoplasmic part	135	8300	0.0021	0.035
GO:0005938	C	cell cortex	10	247	0.0023	0.037
GO:0045334	C	clathrin-coated endocytic vesicle	5	65	0.0024	0.037
GO:0042641	C	actomyosin	5	65	0.0024	0.037
GO:0005811	C	lipid particle	5	66	0.0025	0.039
GO:0042995	C	cell projection	40	1876	0.0026	0.039
GO:0005925	C	focal adhesion	13	391	0.003	0.044
GO:0005903	C	brush border	6	102	0.0032	0.045
GO:0005924	C	cell-substrate adherens junction	13	394	0.0032	0.045
GO:0005902	C	microvillus	6	103	0.0033	0.046
GO:0030055	C	cell-substrate junction	13	399	0.0035	0.048
GO:0060205	C	cytoplasmic membrane-bounded vesicle lumen	6	105	0.0036	0.049
GO:0030054	C	cell junction	31	1379	0.0038	0.05
GO:0031983	C	vesicle lumen	6	106	0.0038	0.05
